# Supplementary material for: One-pot copper nanoparticle-catalyzed synthesis of S-aryl- and S-vinyl dithiocarbamates in water: high diastereoselectivity achieved for vinyl dithiocarbamates
Source: Royal Society of Chemistry journal article supplement (doi:10.1039/b809200a), 2008-01-01

## SUPPLEMENTARY INFORMATION

### **One-pot copper nanoparticles-catalyzed green synthesis of S-aryl- and S-vinyl dithiocarbamates in water: high diastereoselectivity achieved for vinyl dithiocarbamates**

**Sukalyan Bhadra, Amit Saha and Brindaban C. Ranu**

*Department of Organic Chemistry, Indian Association for the Cultivation of Science, Jadavpur, Kolkata – 700 032, India.*

### **Table of Contents**

|                                                                               | Page no. |
|-------------------------------------------------------------------------------|----------|
| <sup>1</sup> H NMR and <sup>13</sup> C NMR Spectra of All Products in Table 1 | 2-22     |

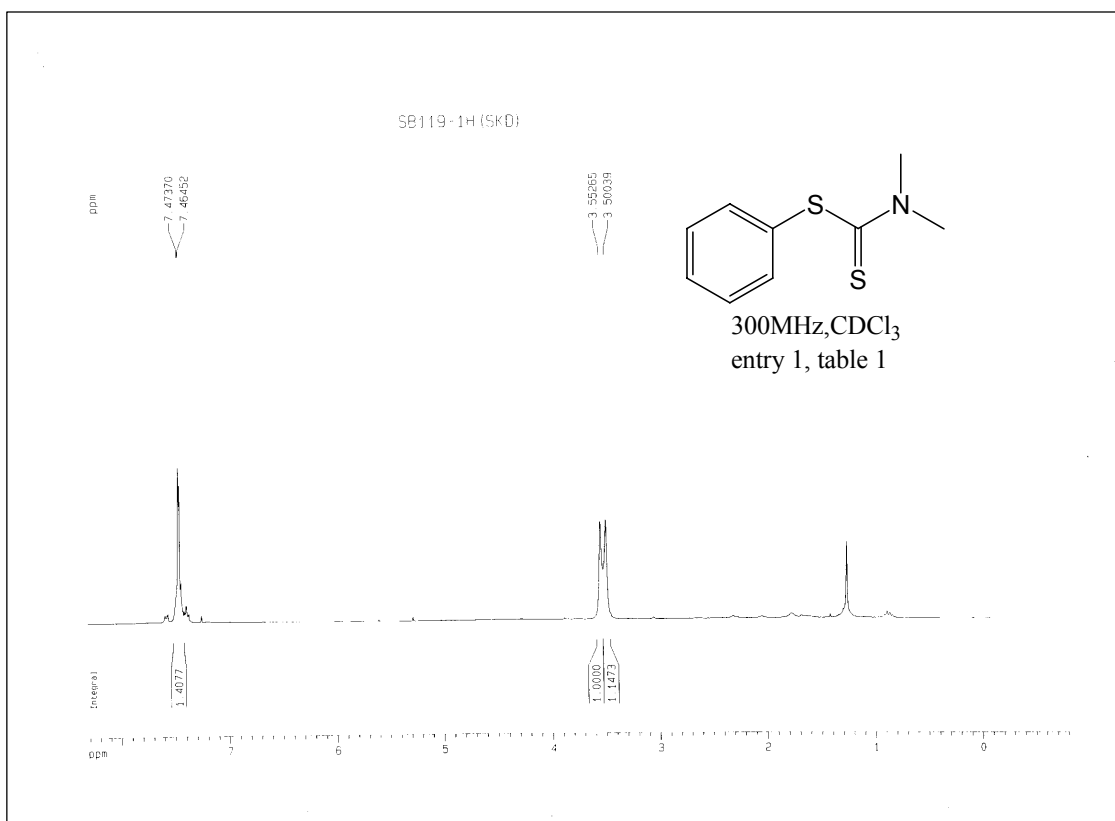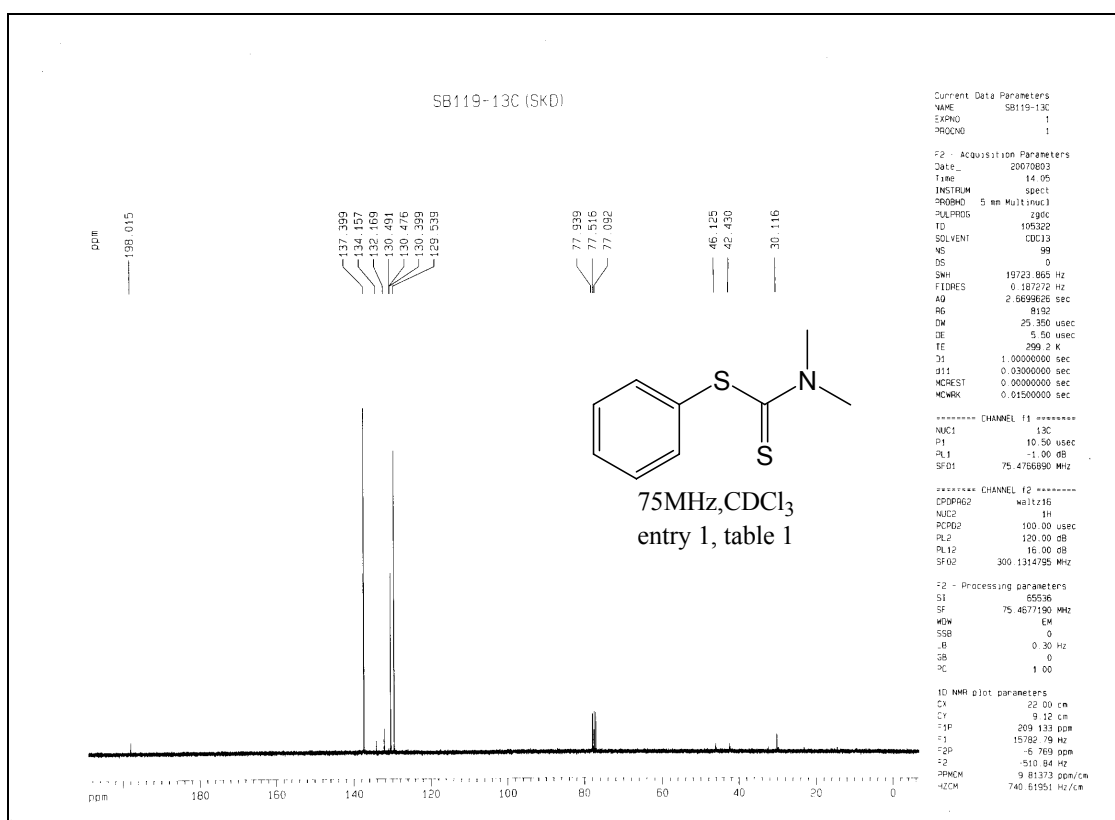

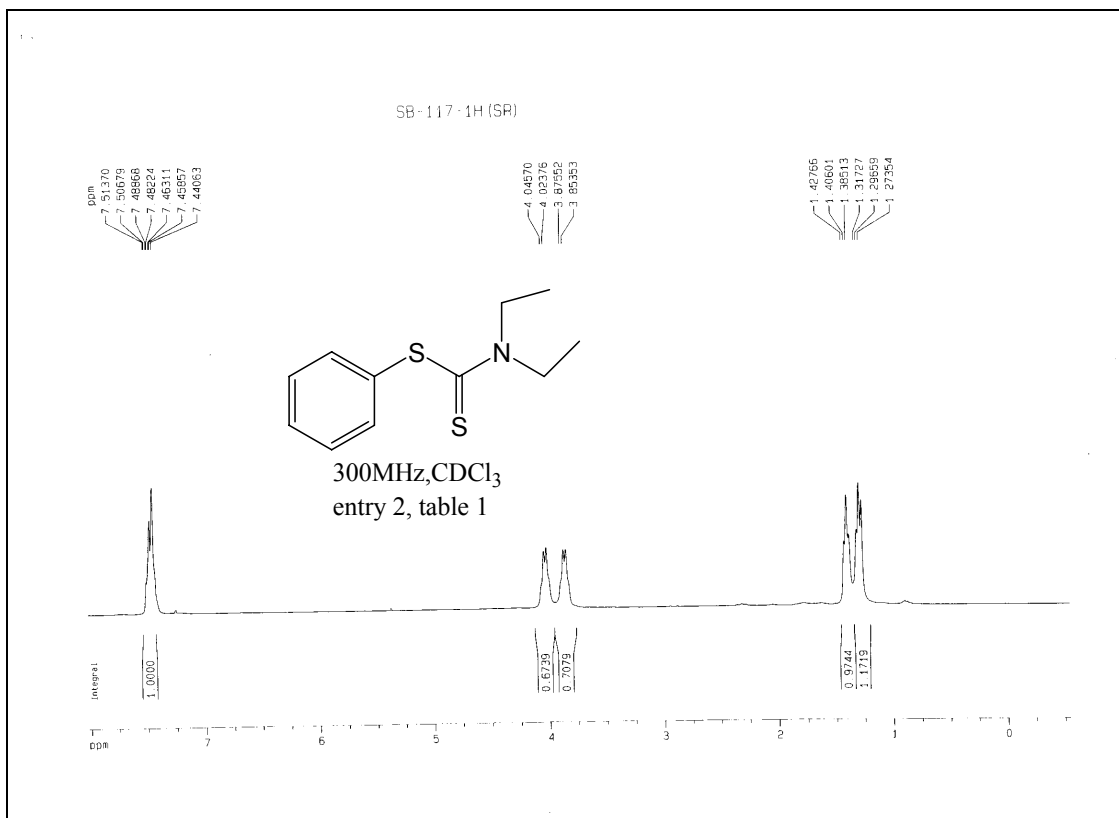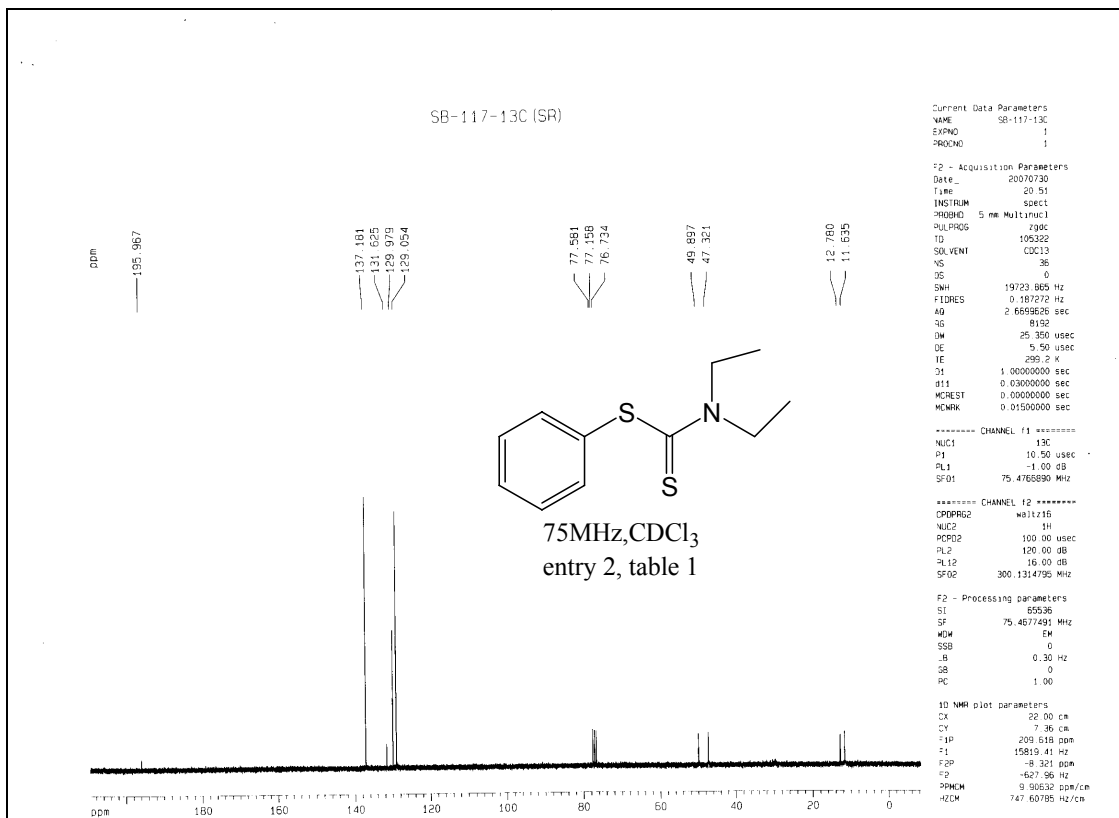

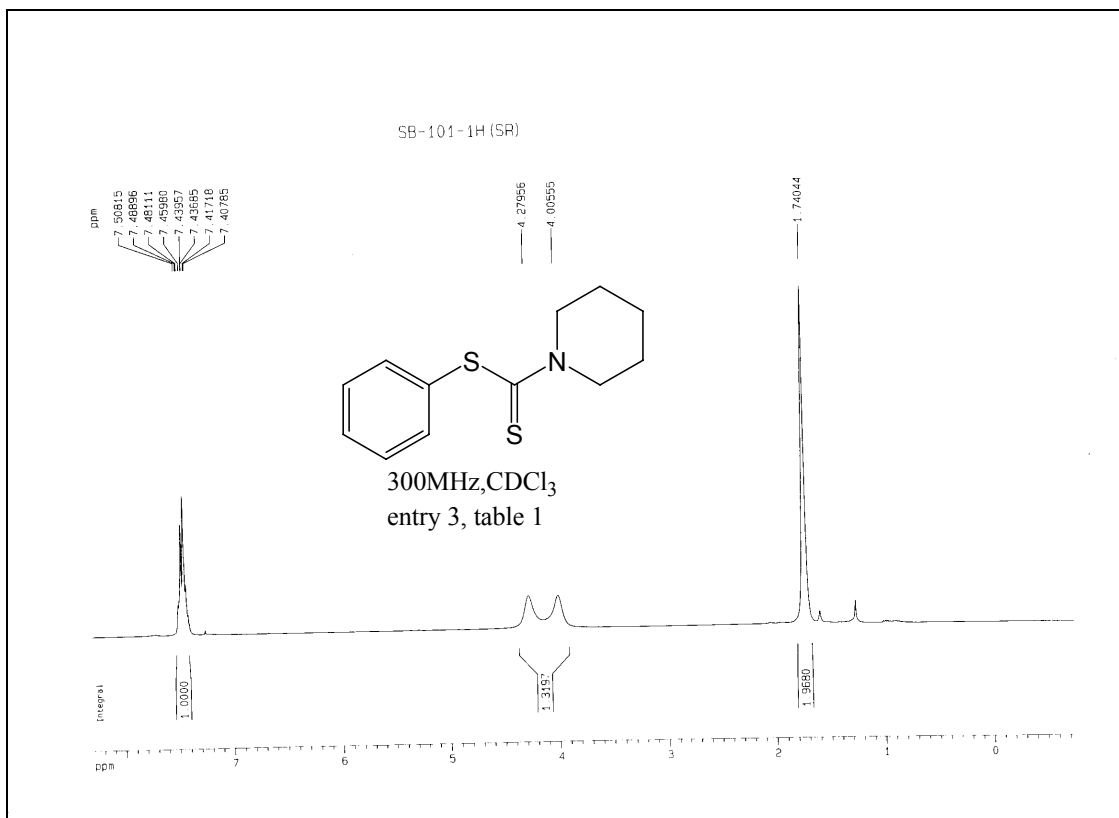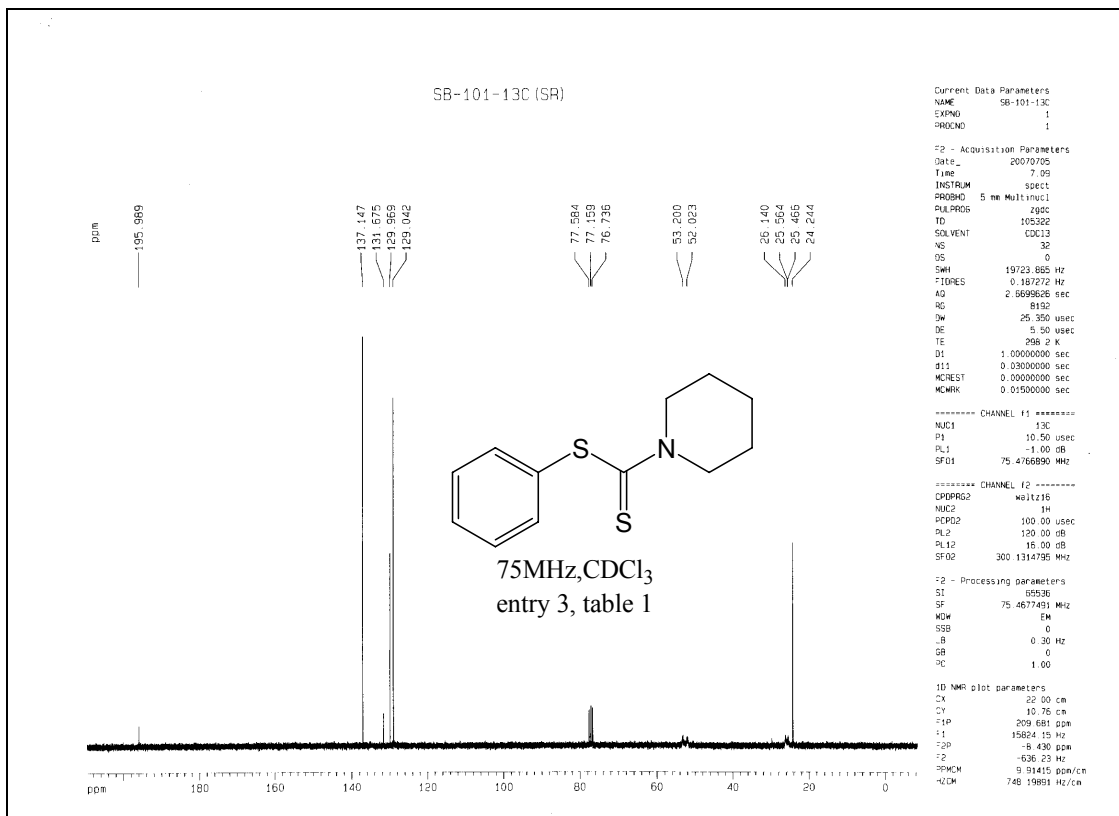

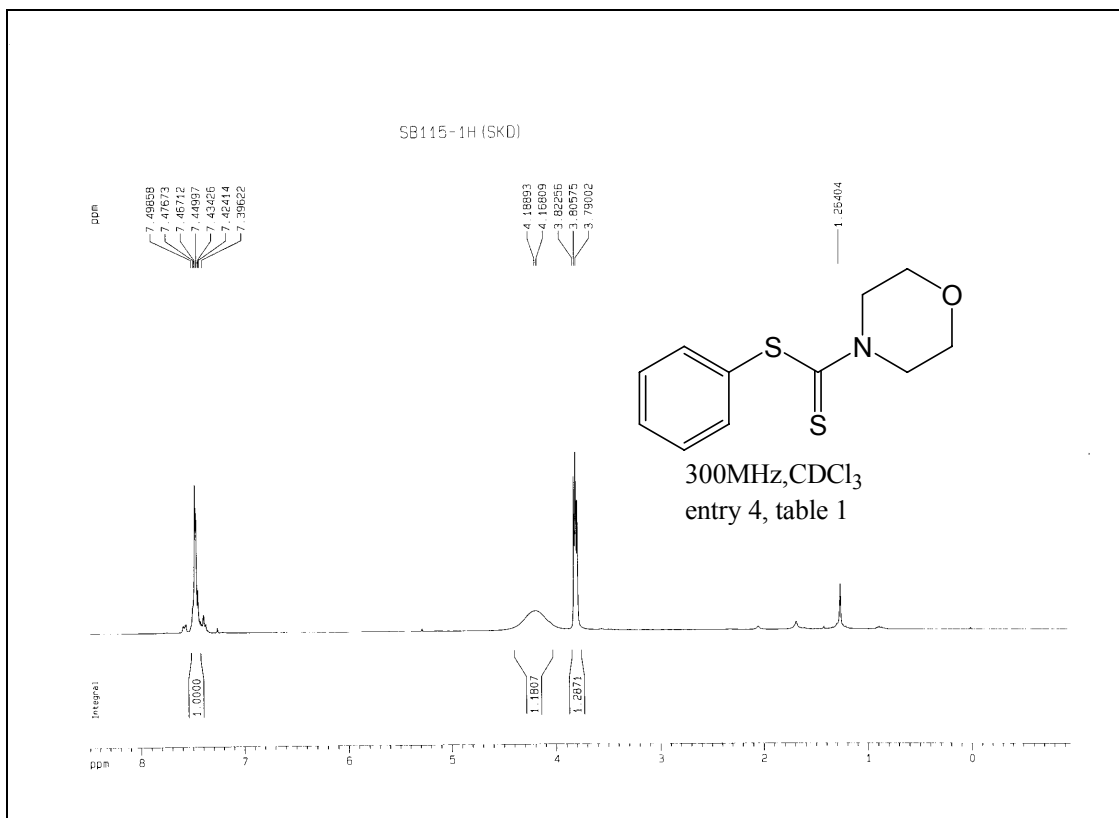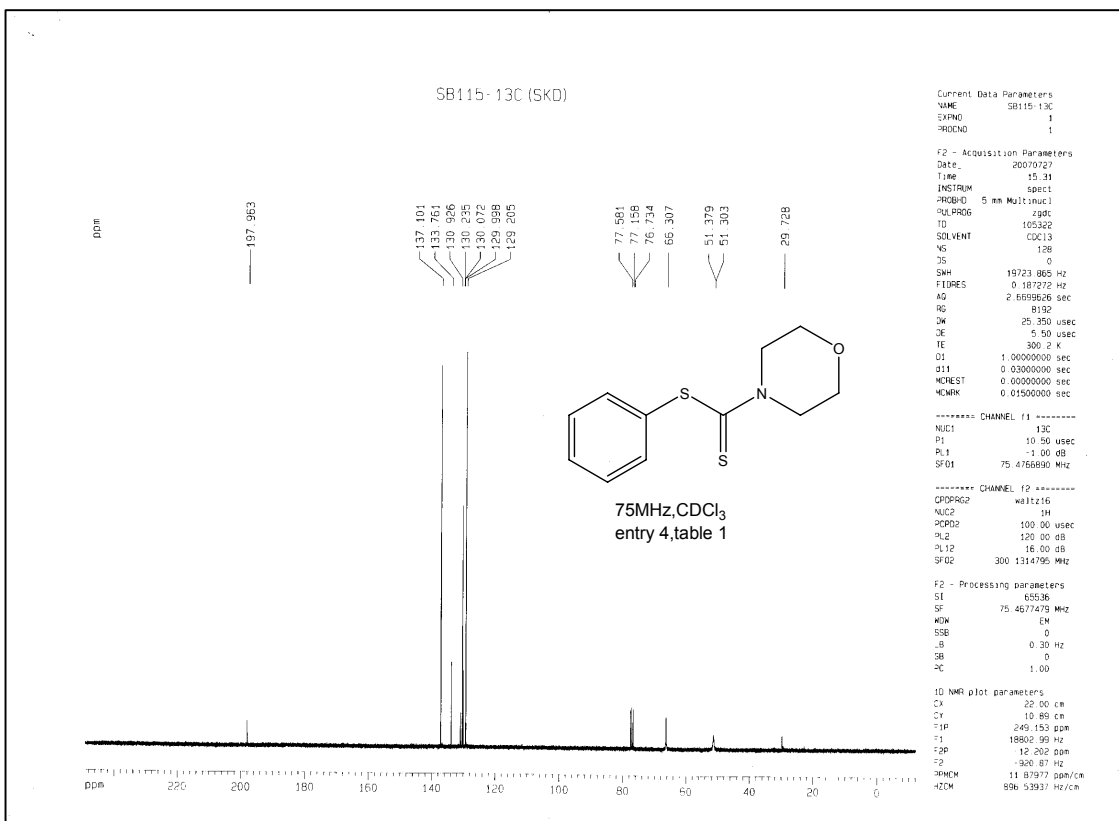

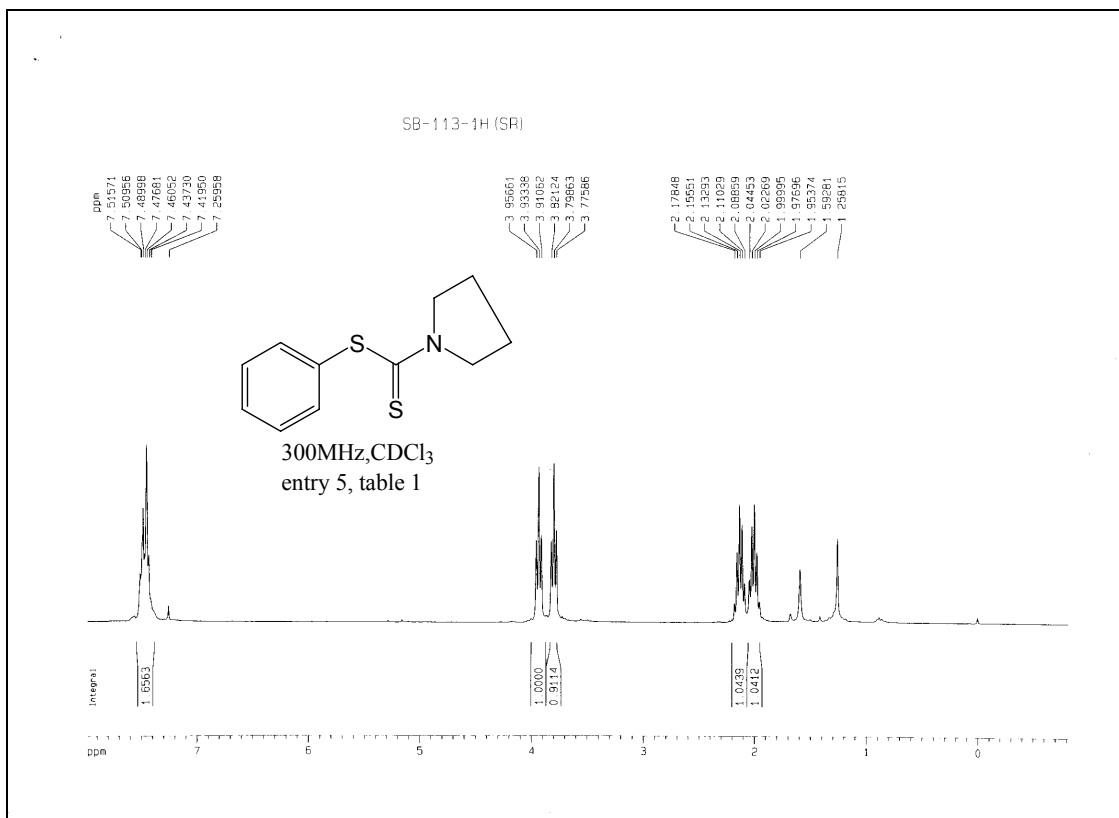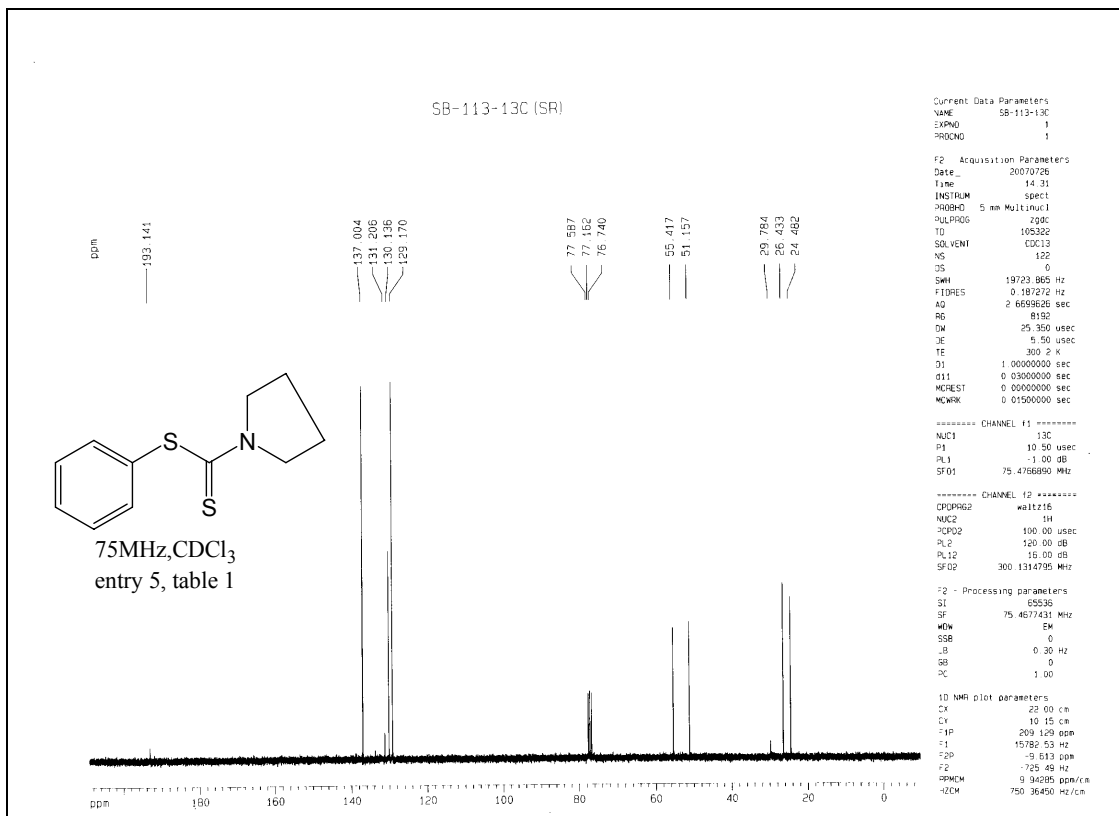

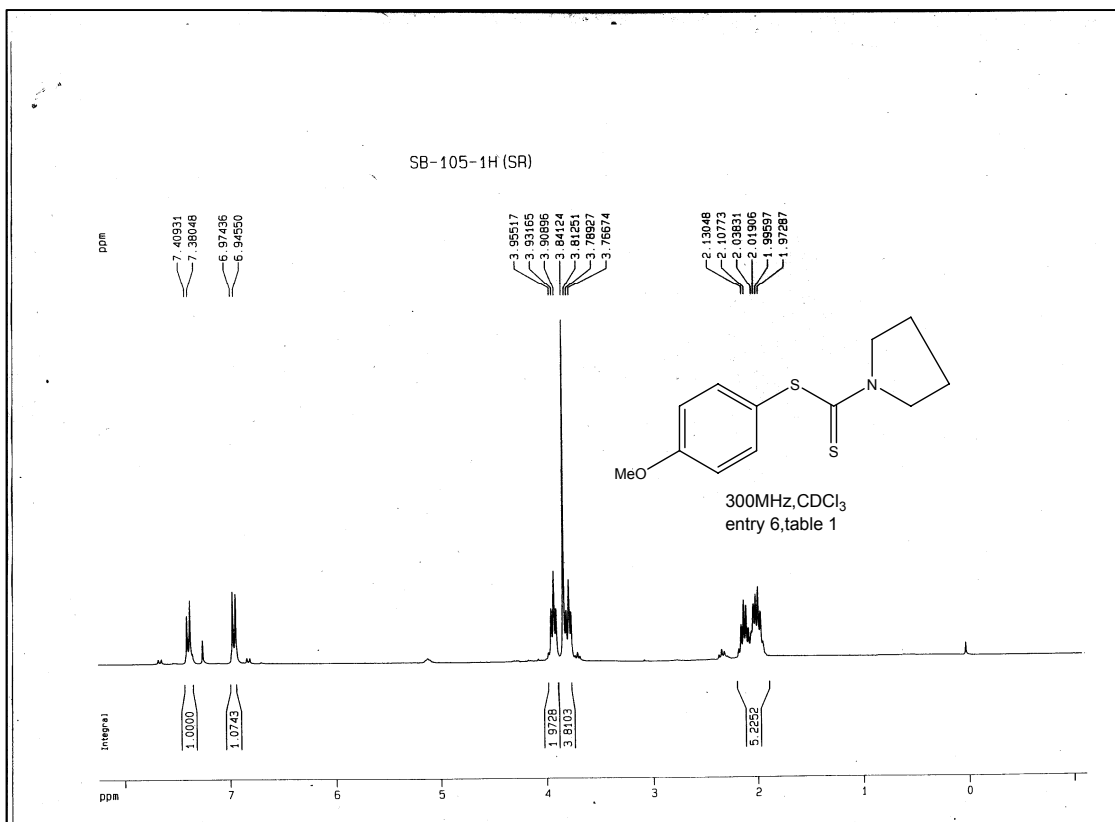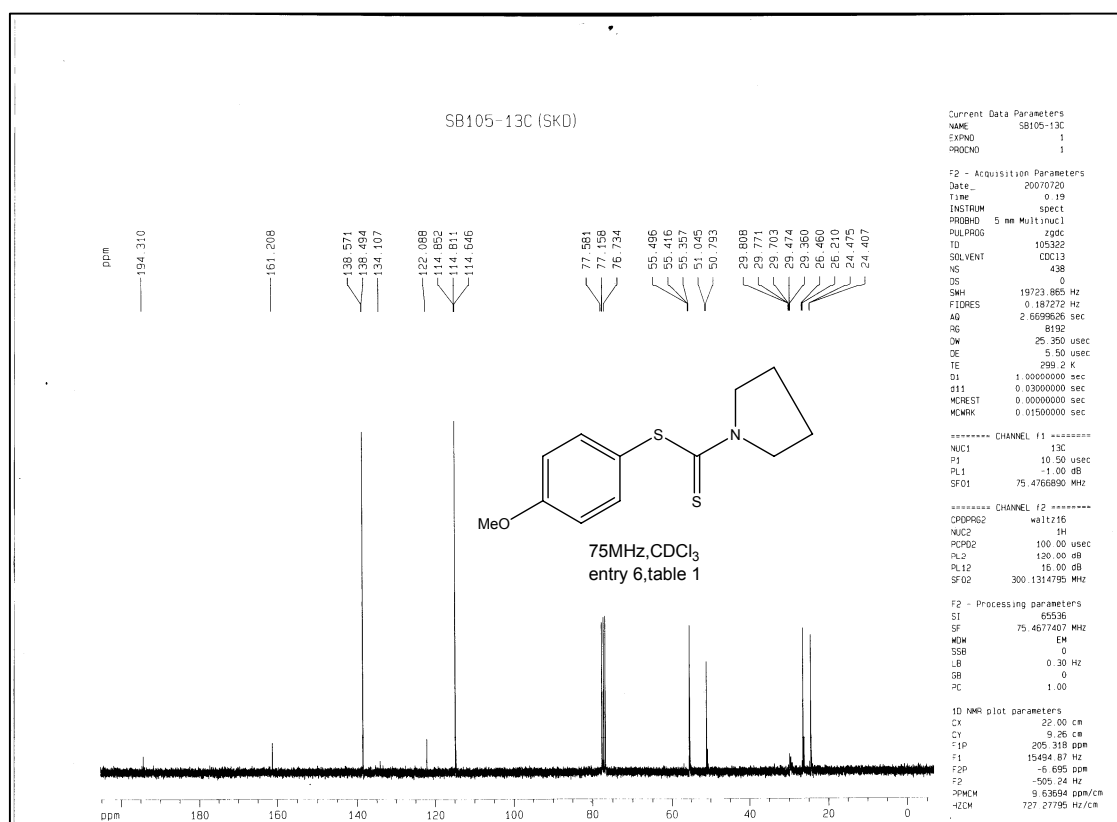

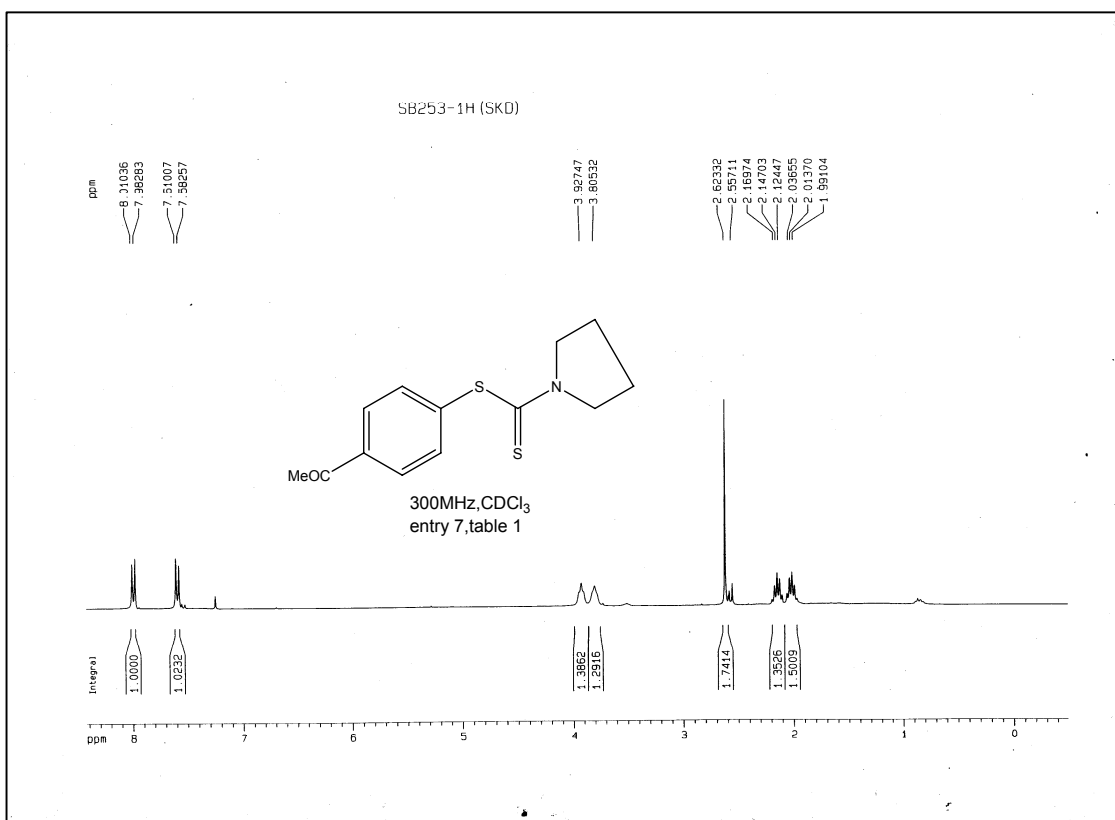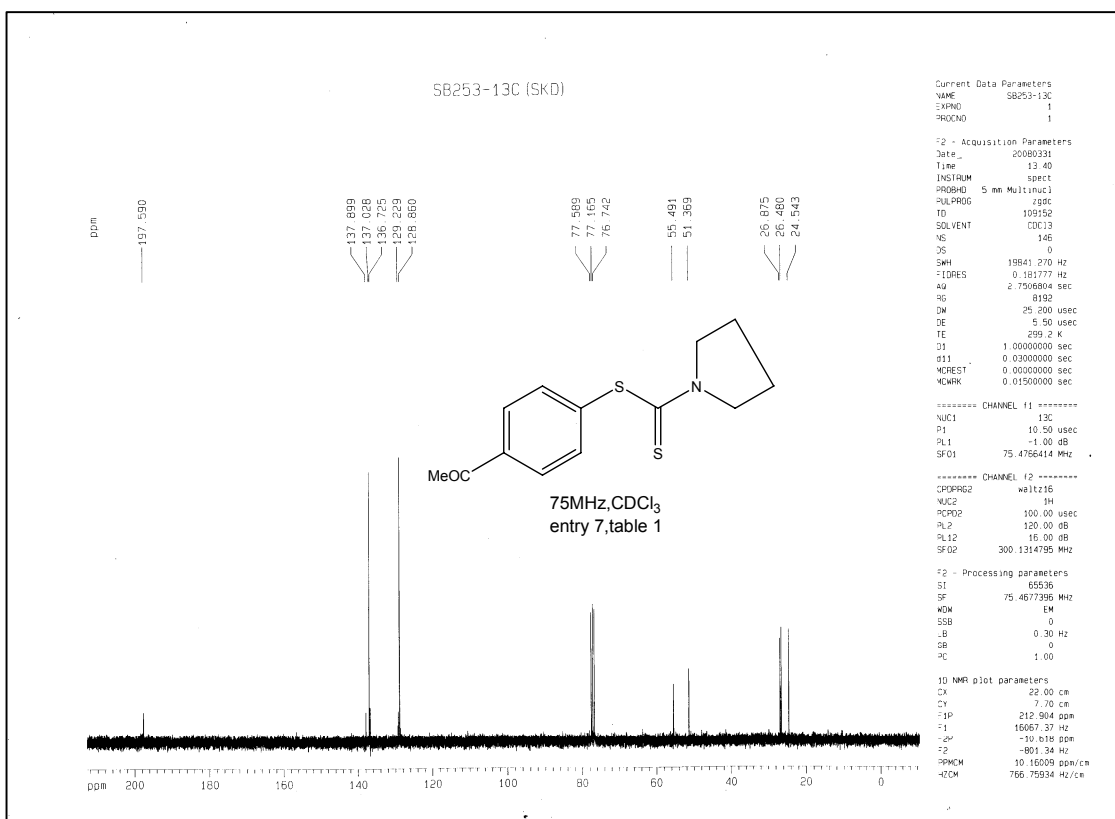



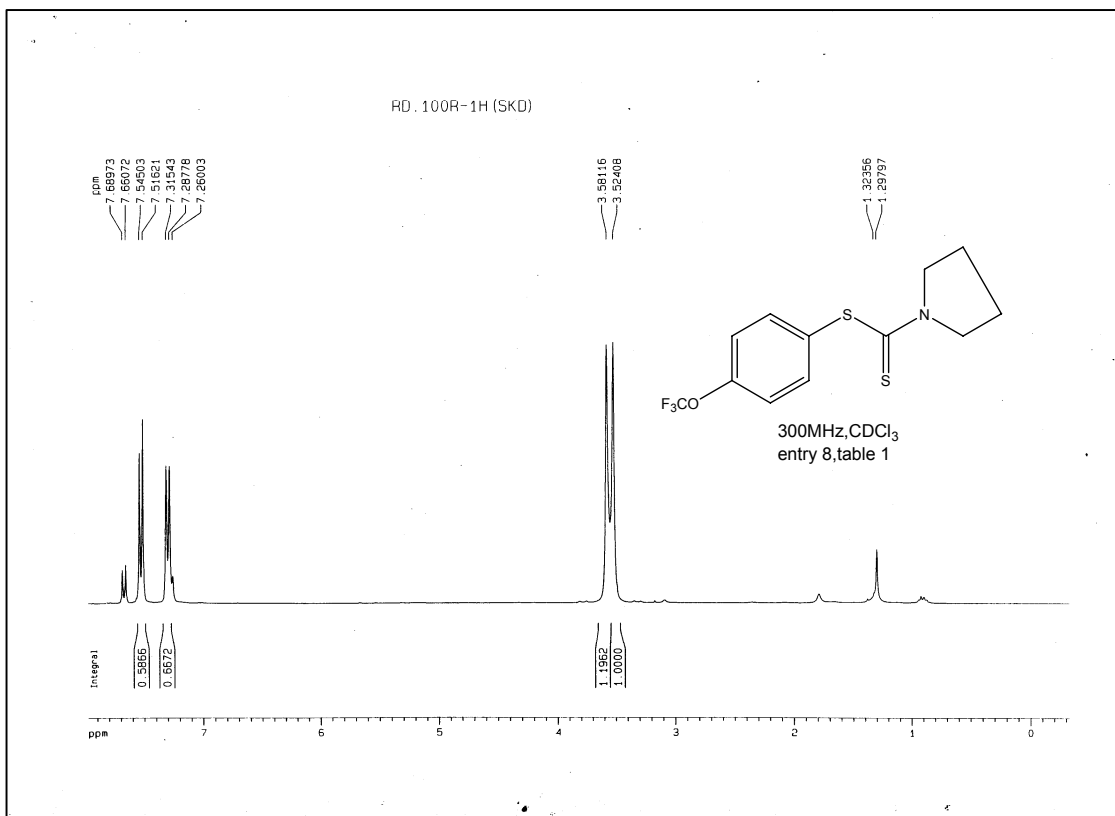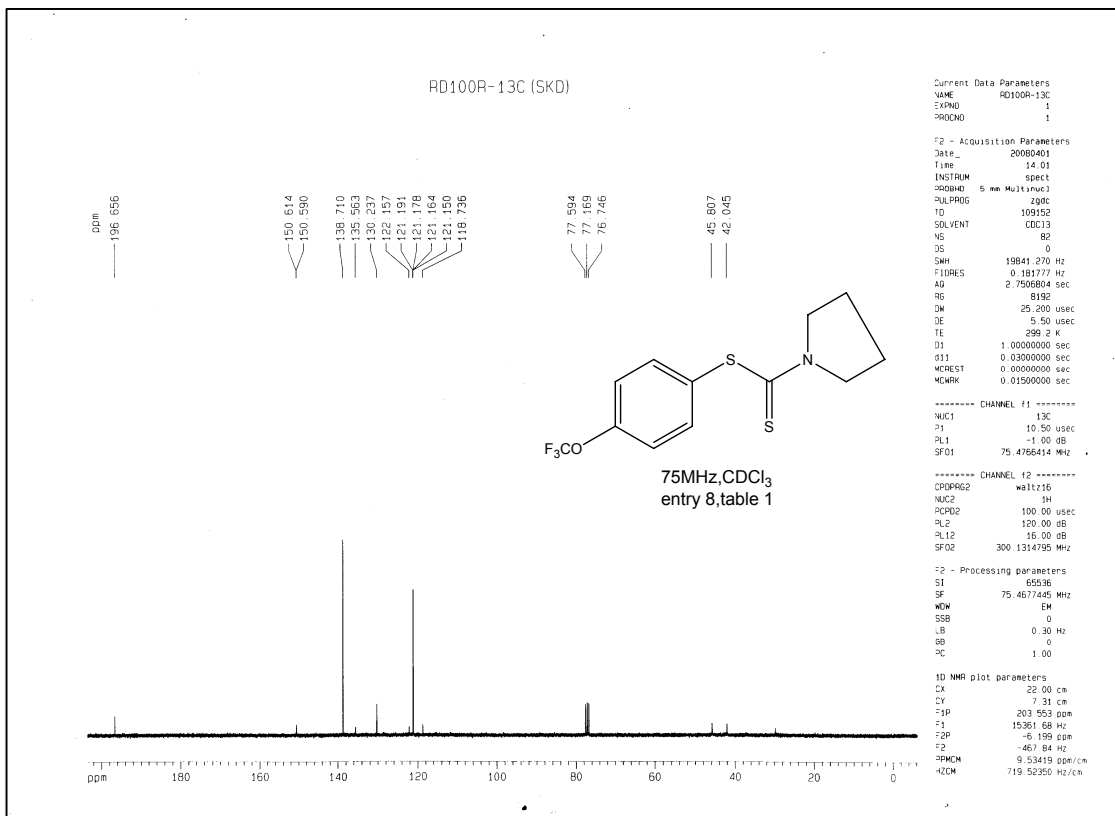

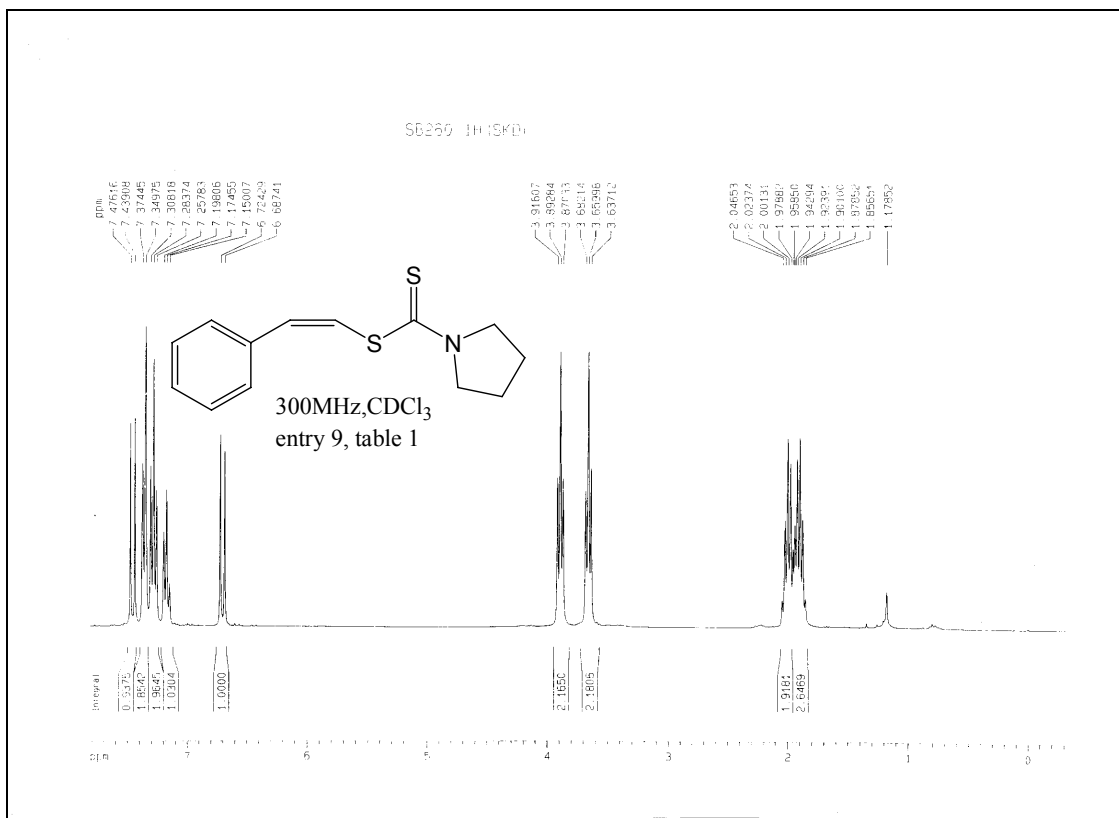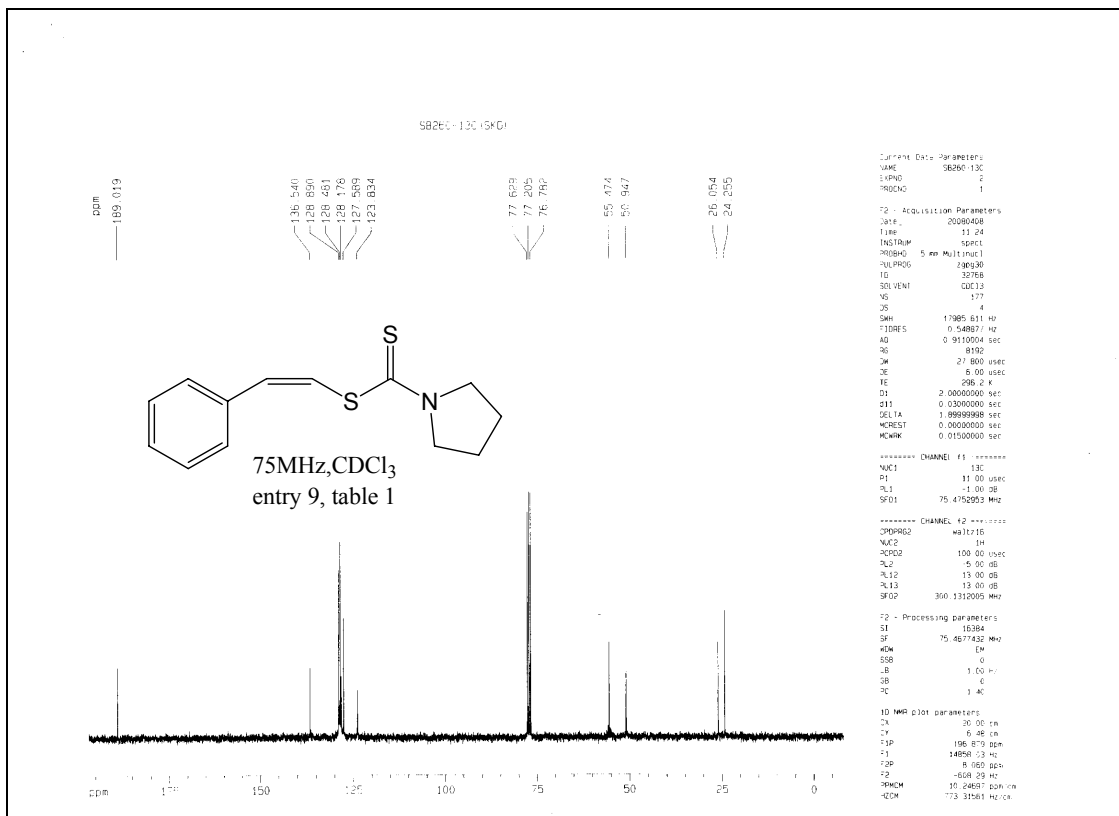

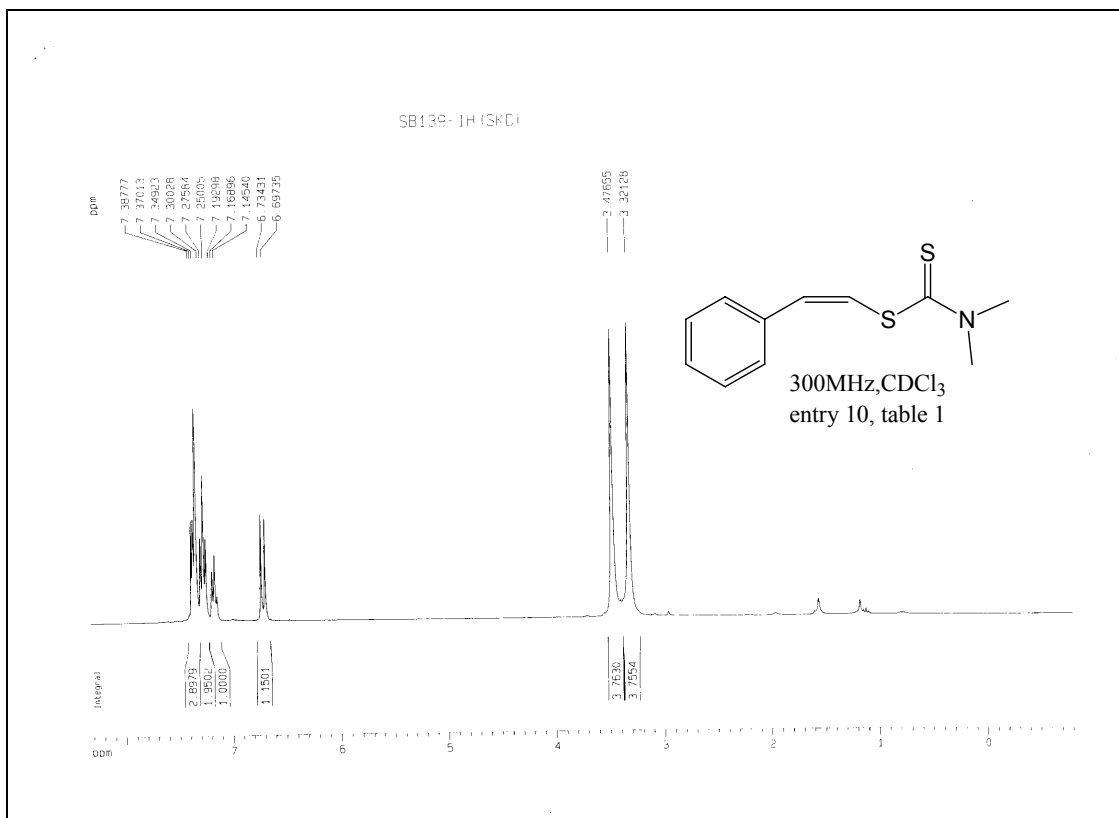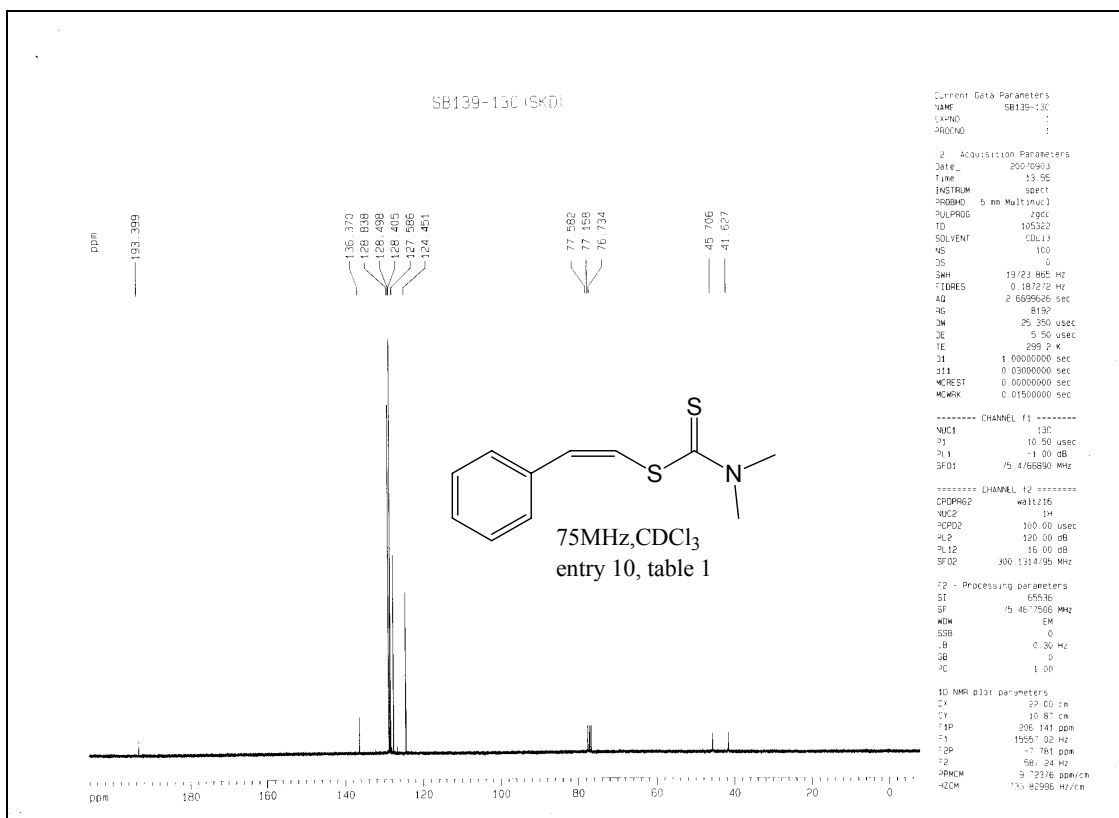

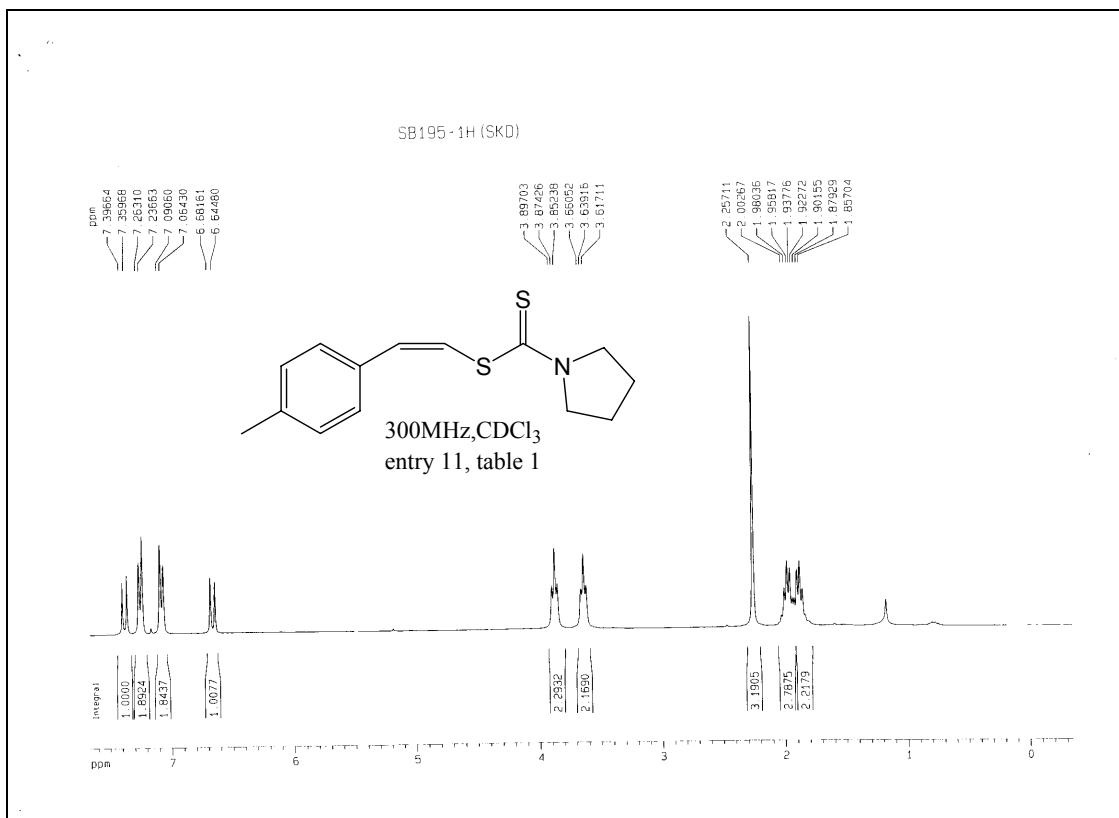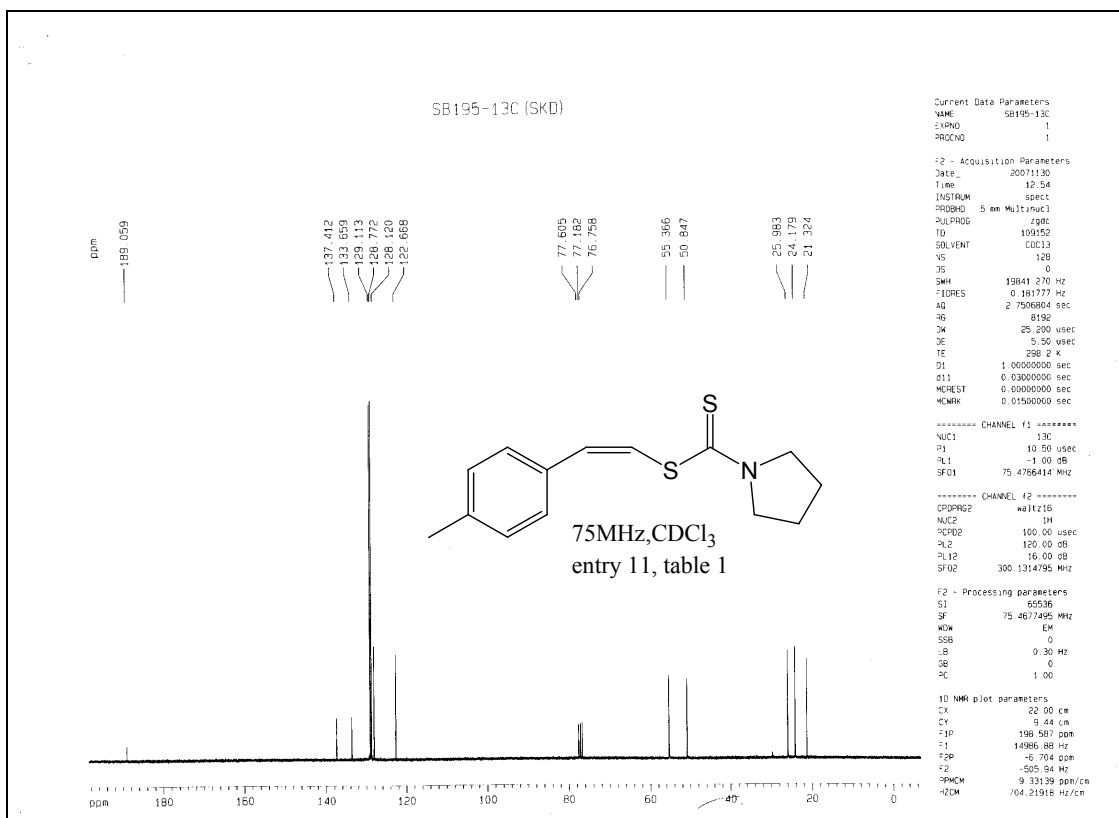

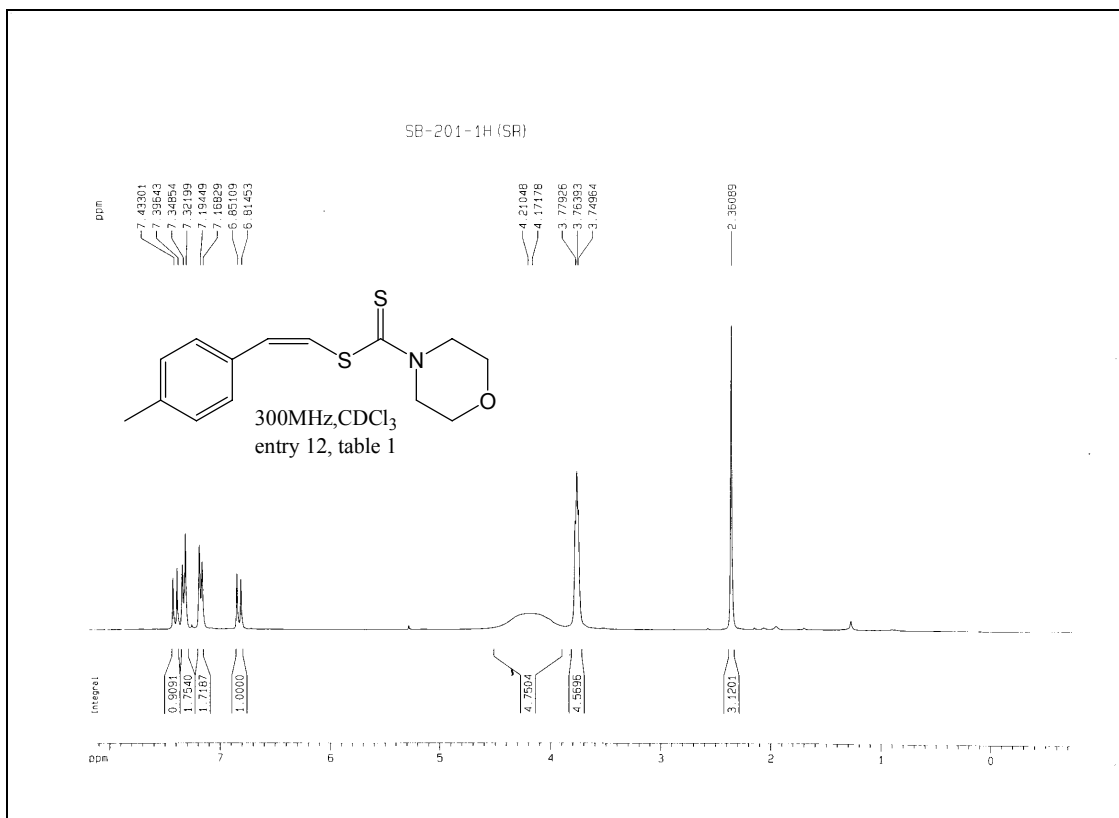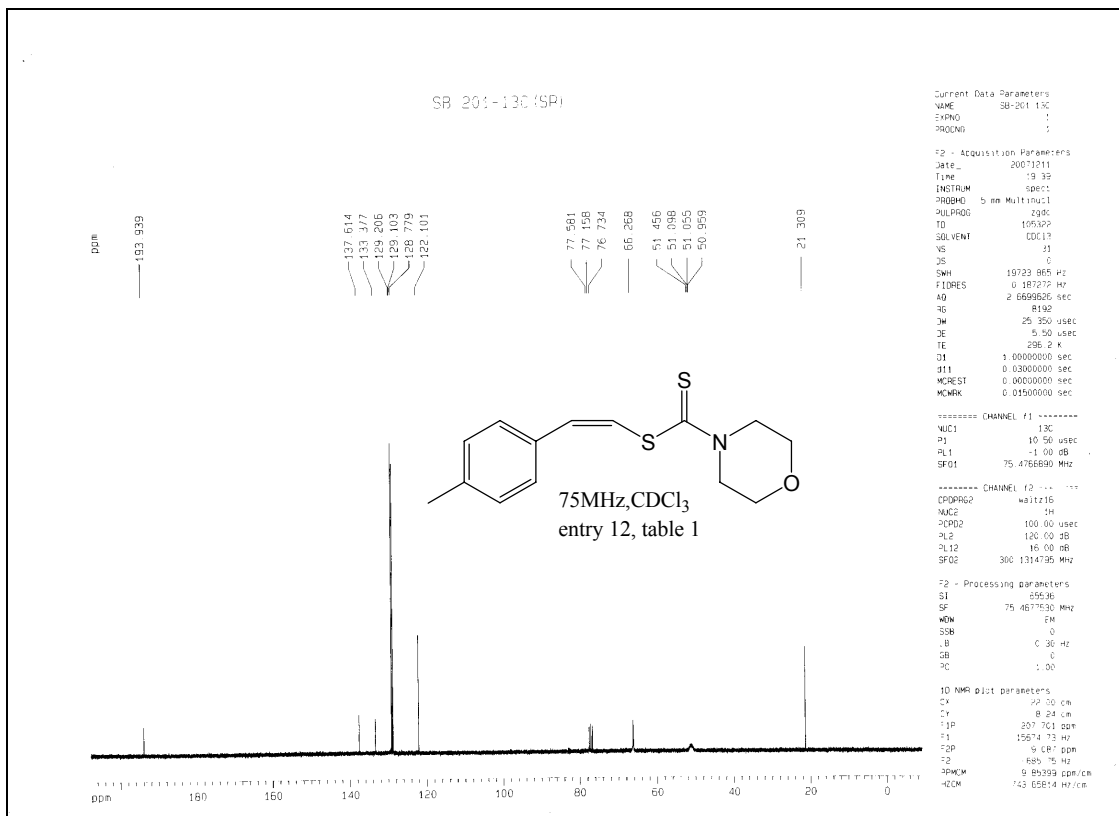

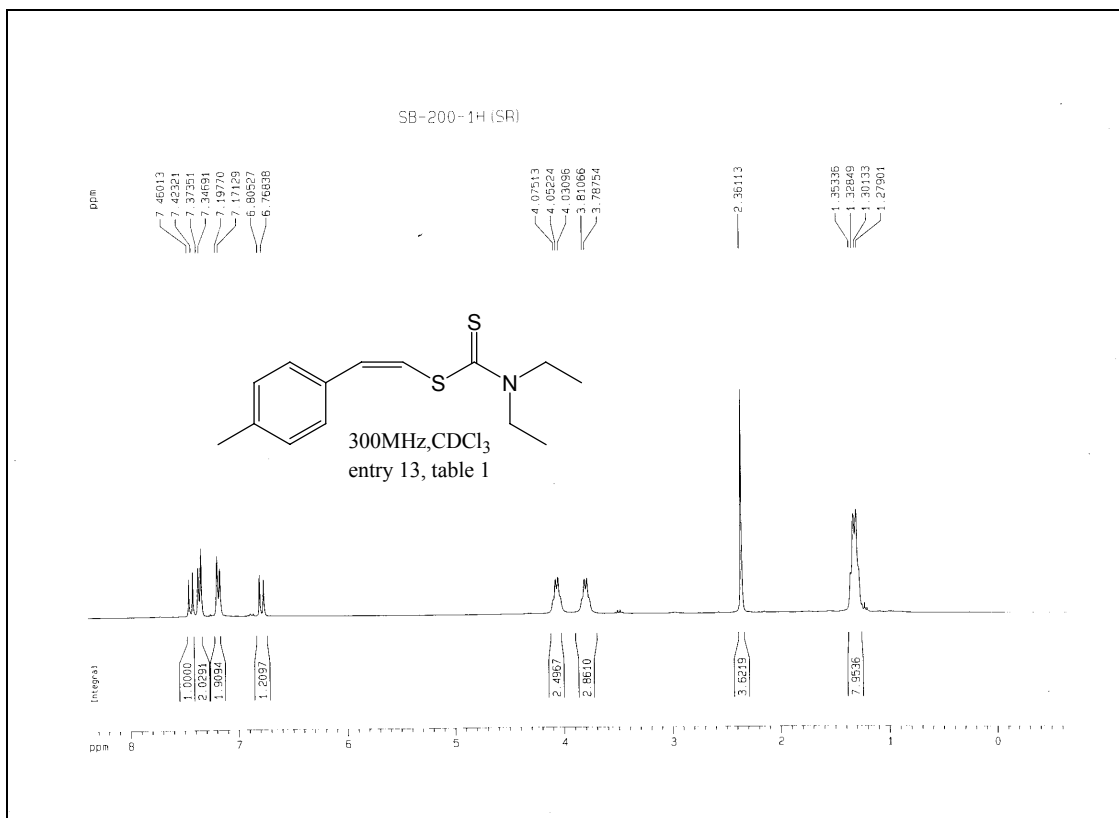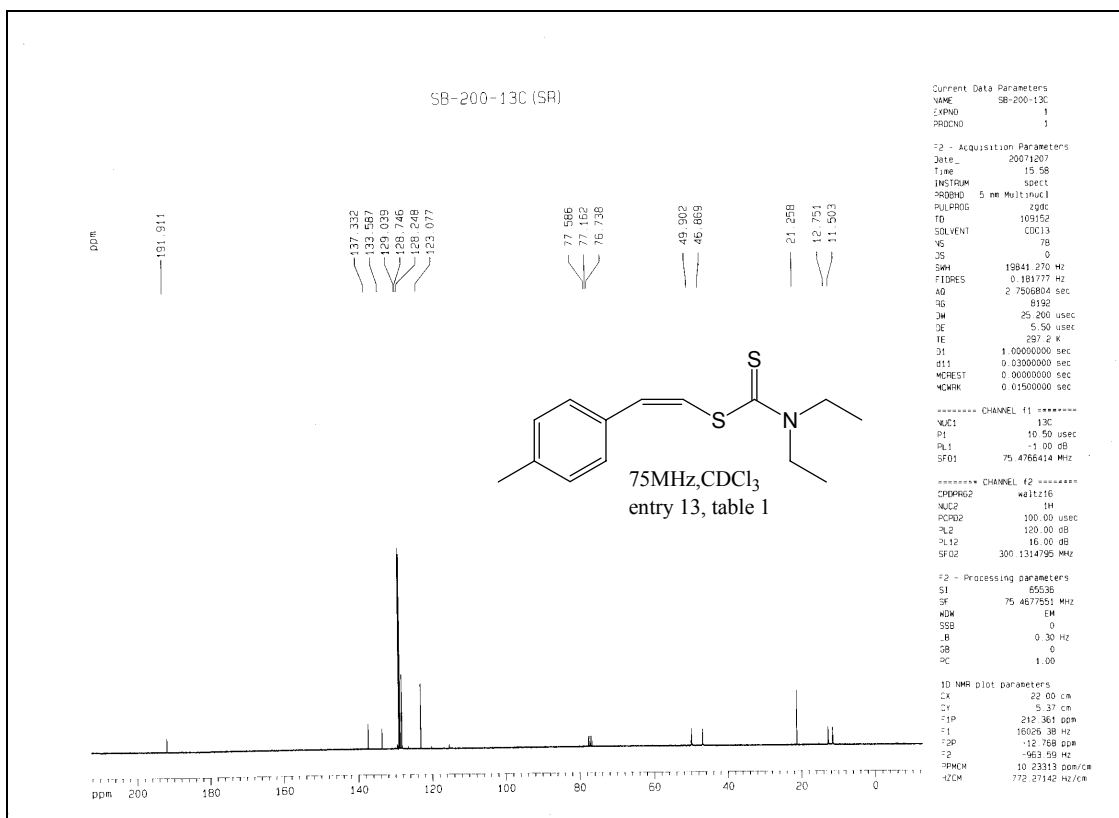

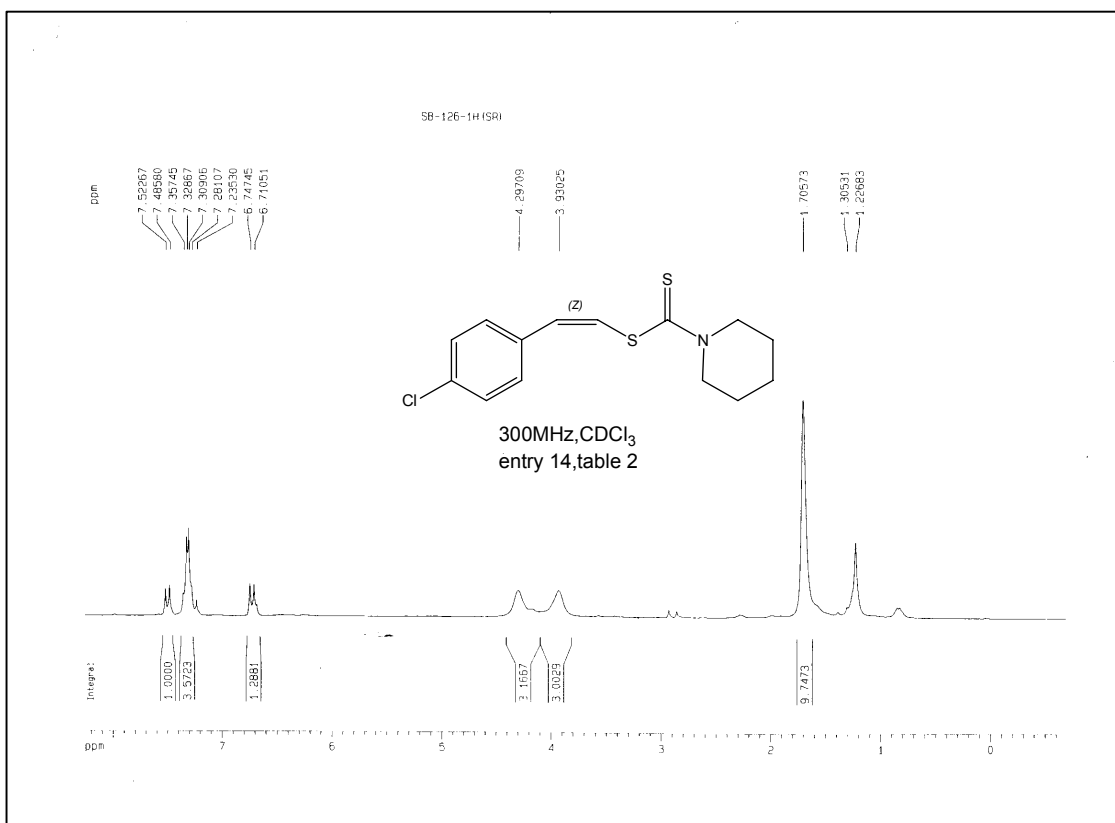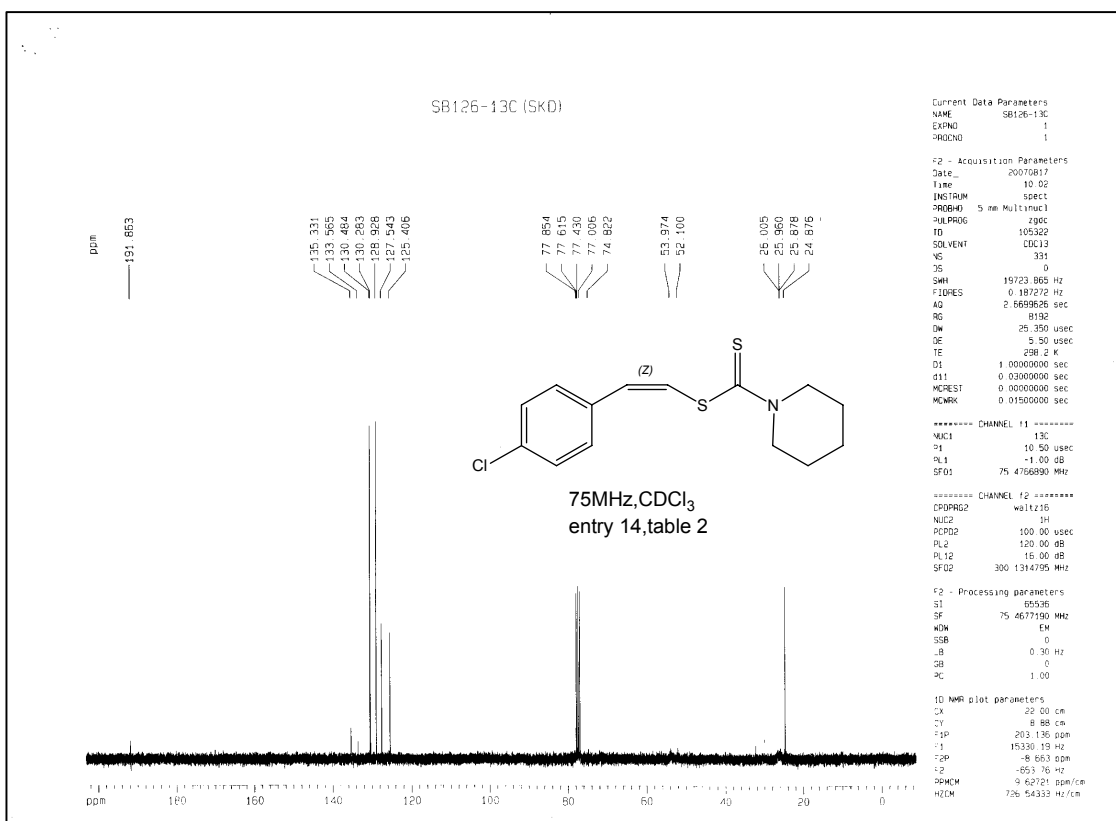

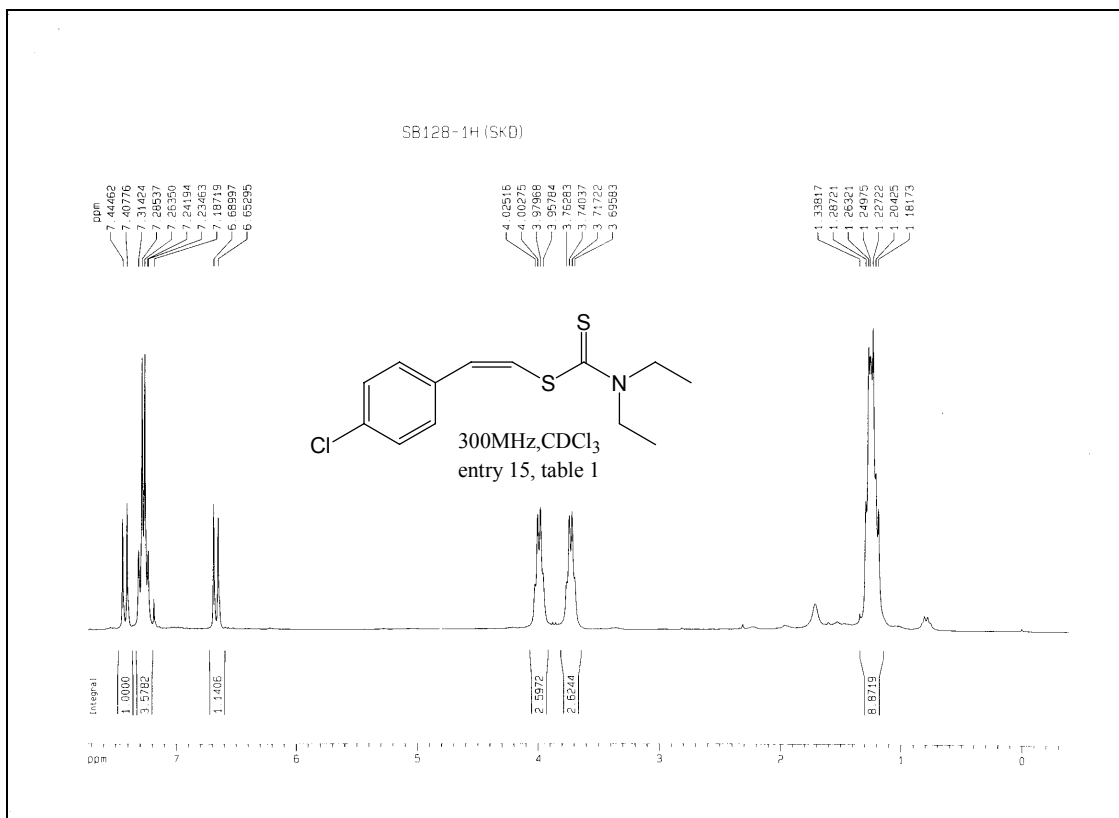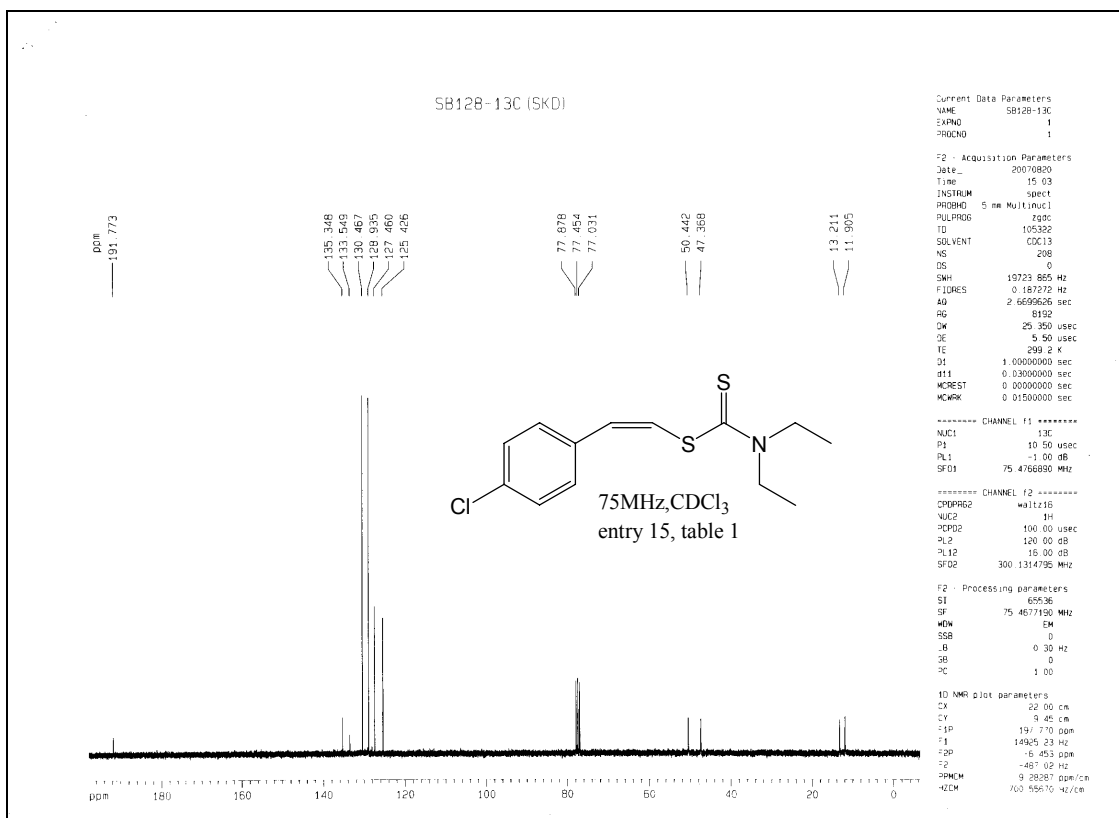



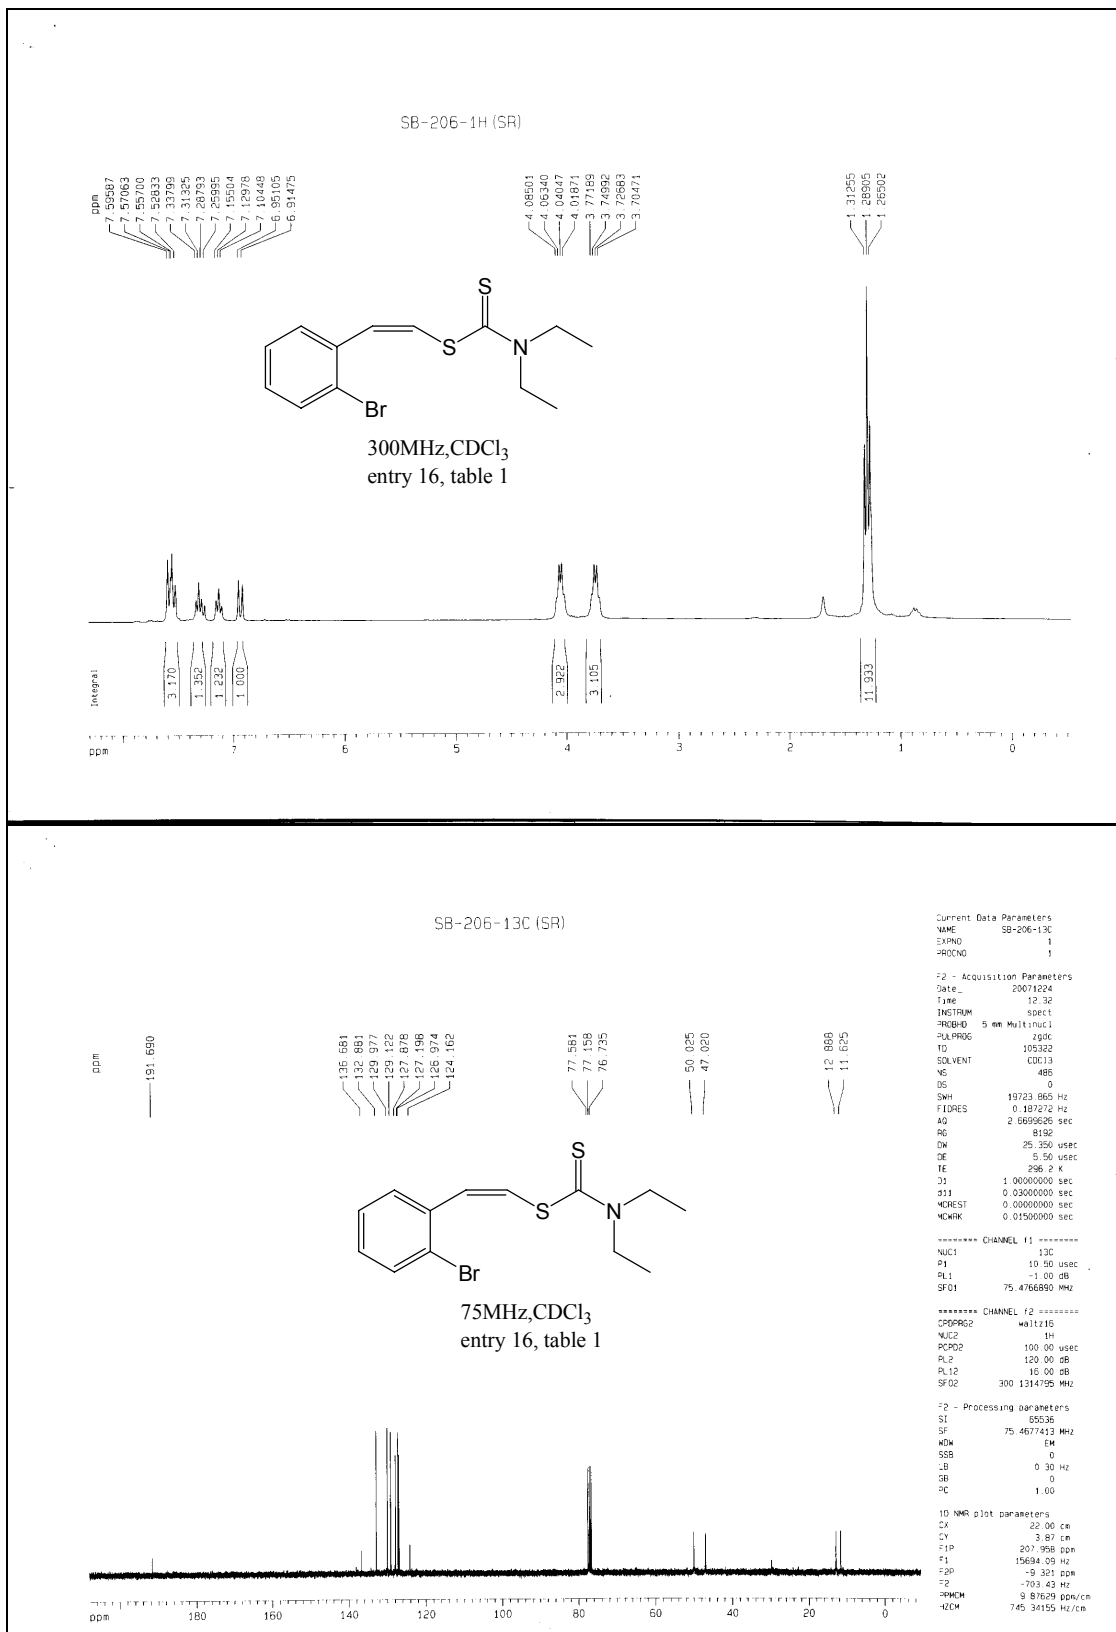

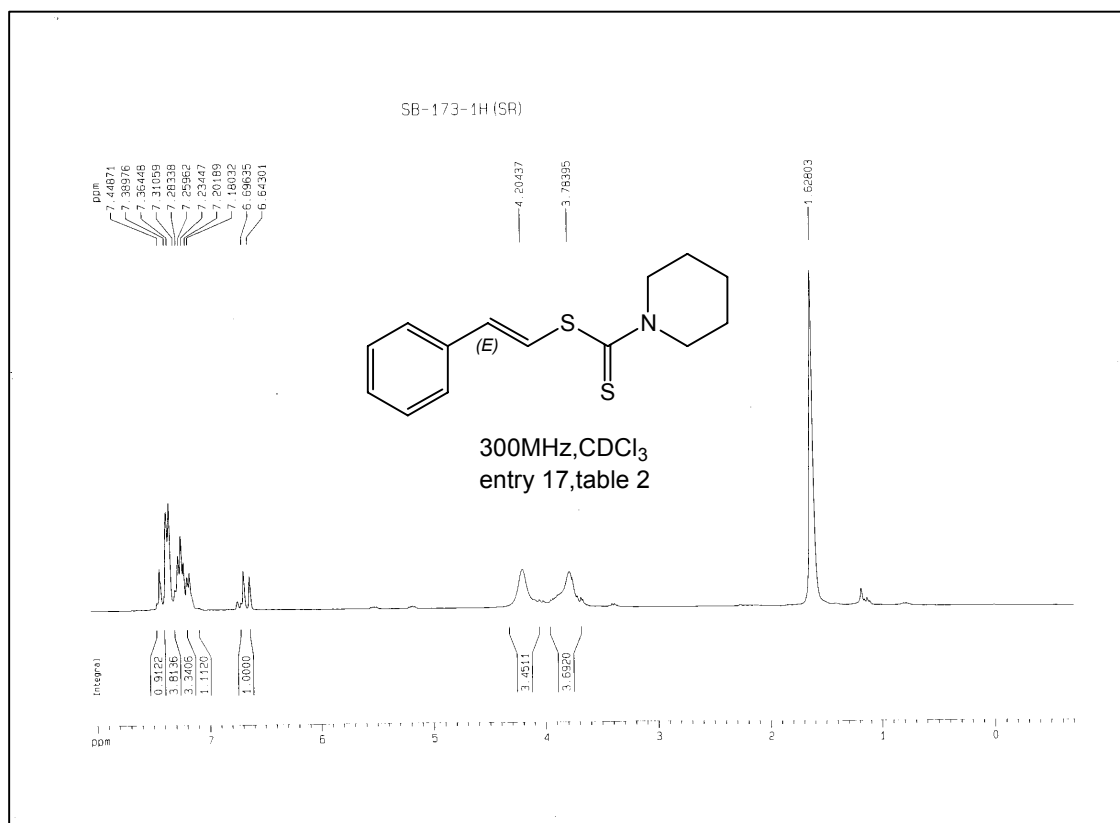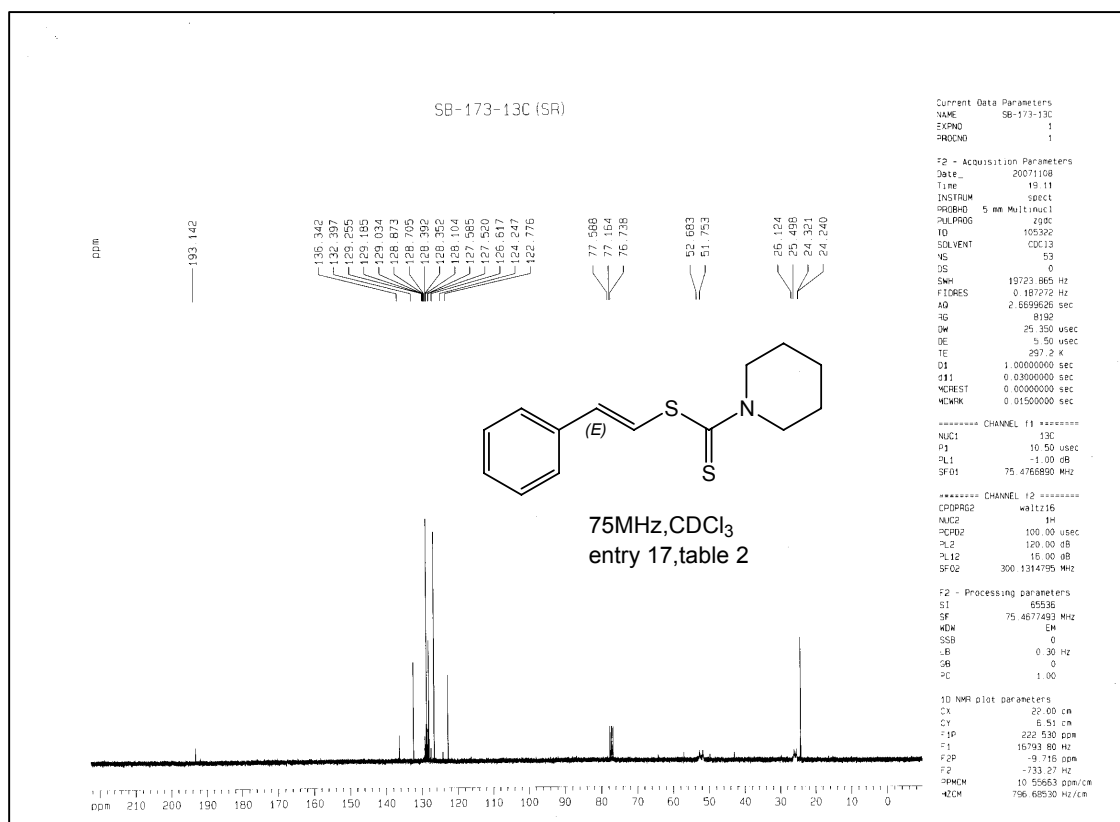

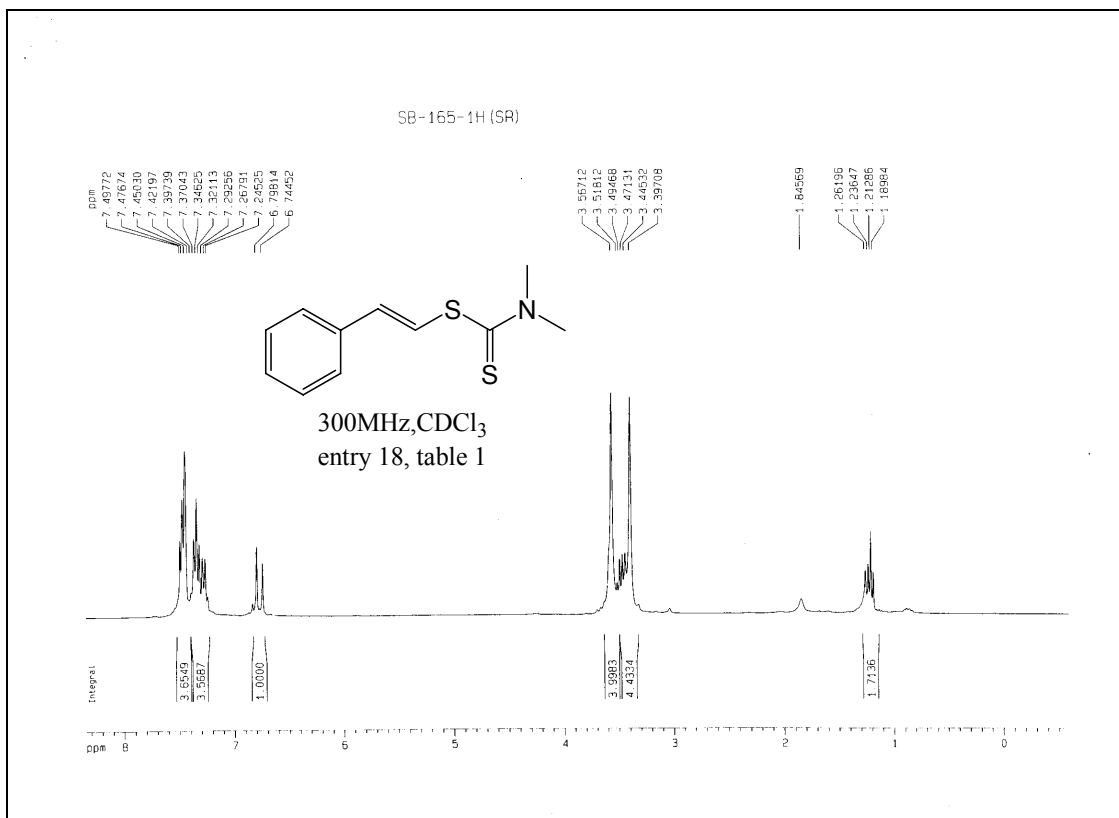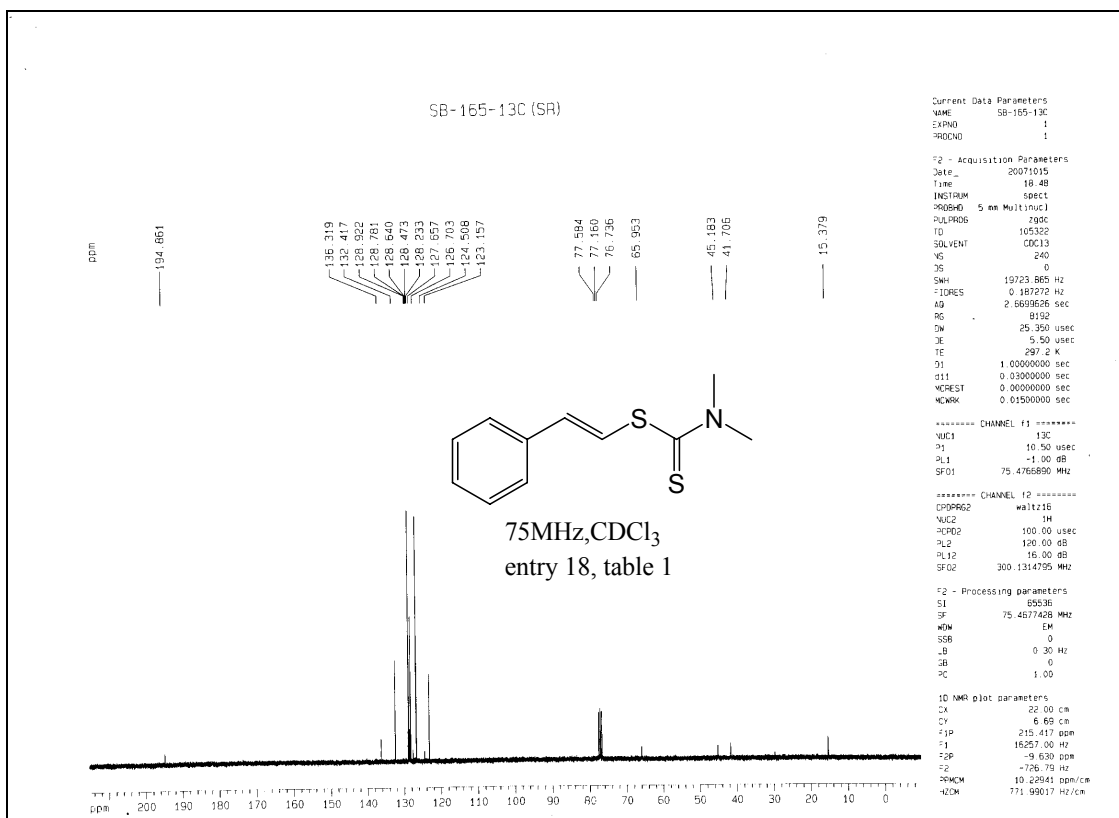

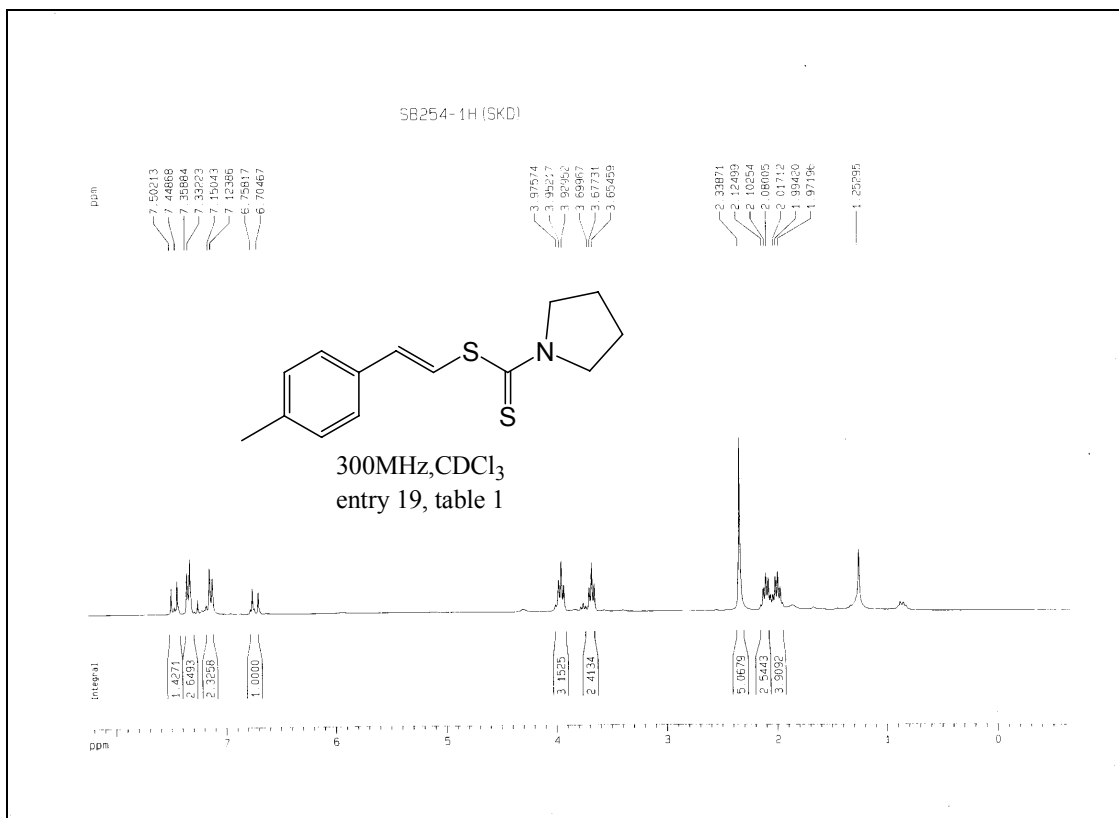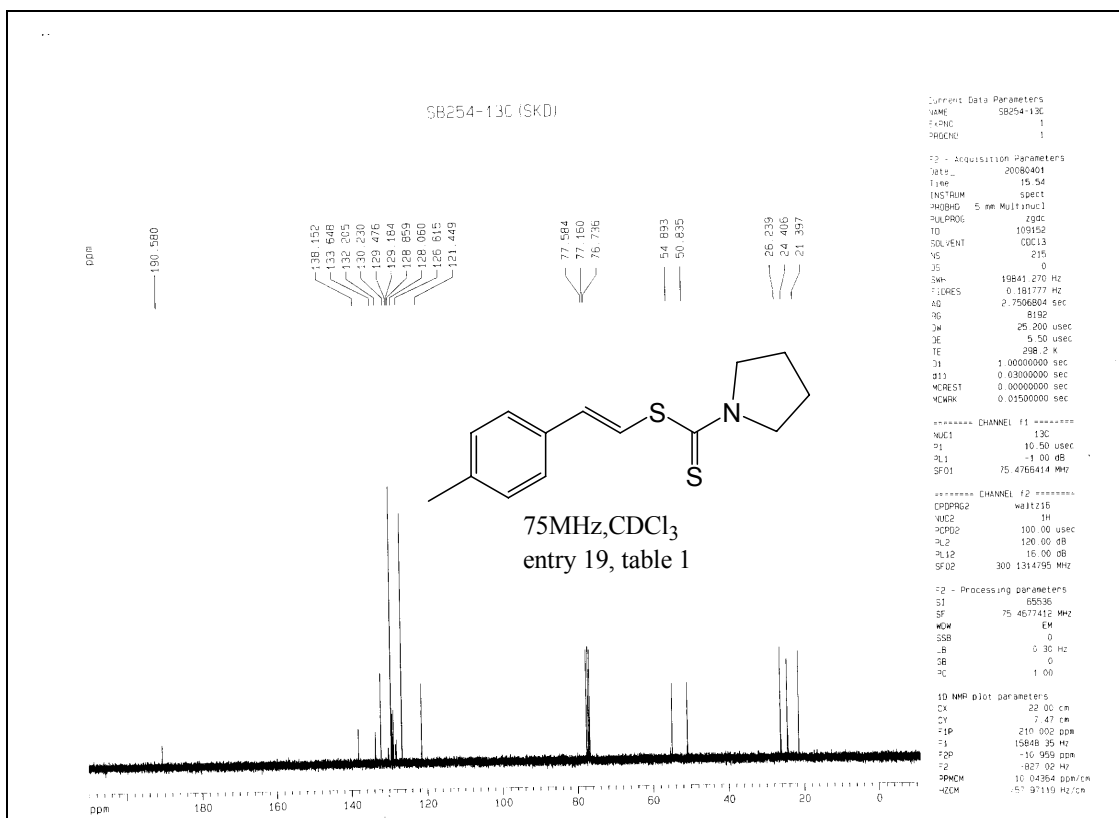

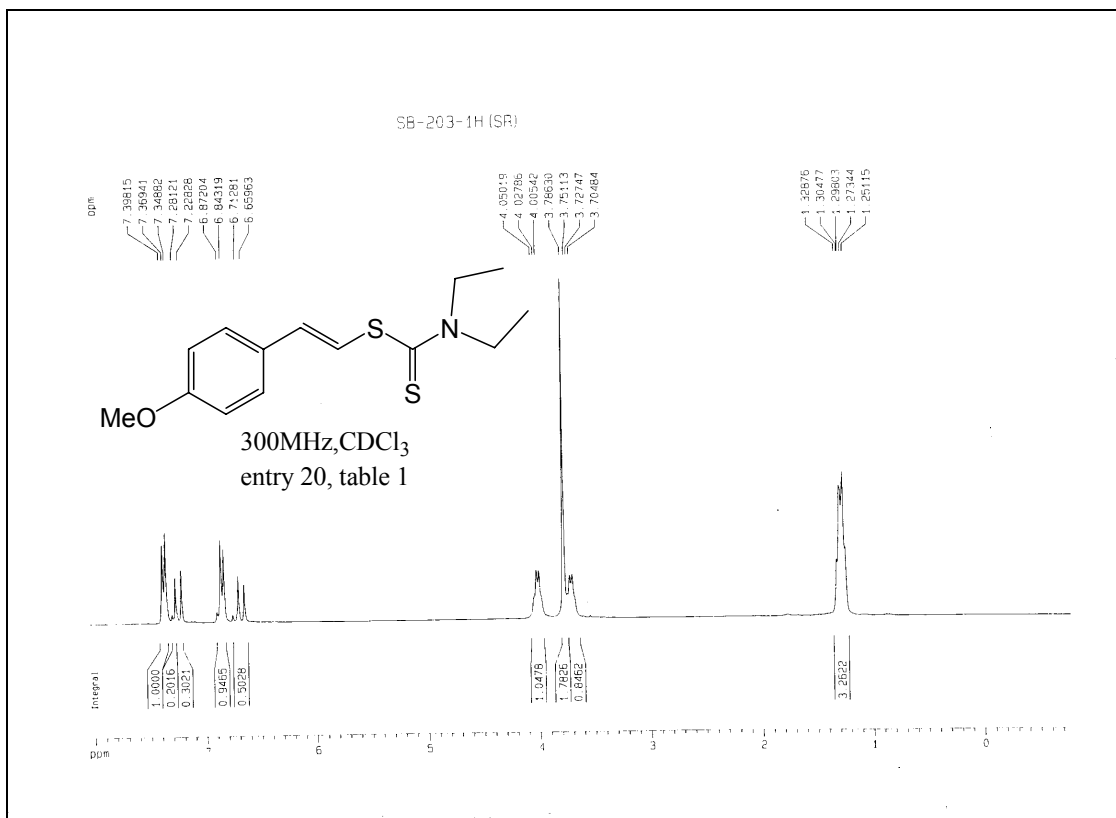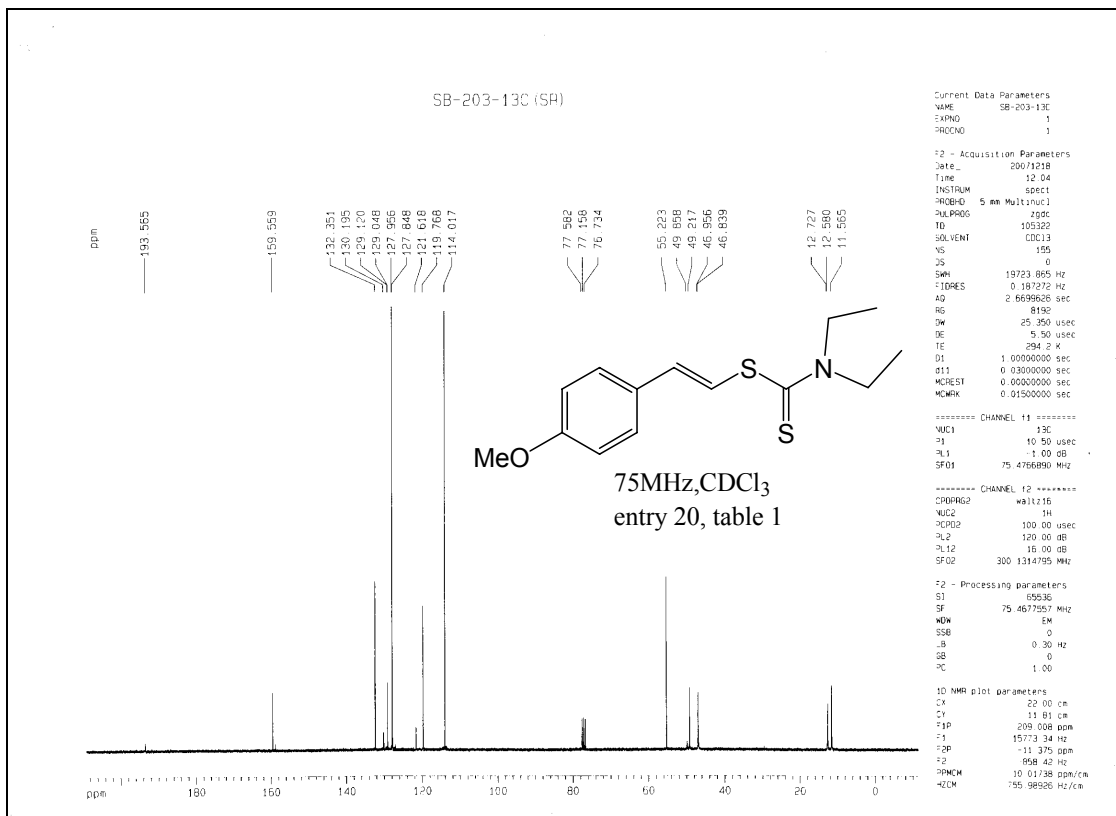

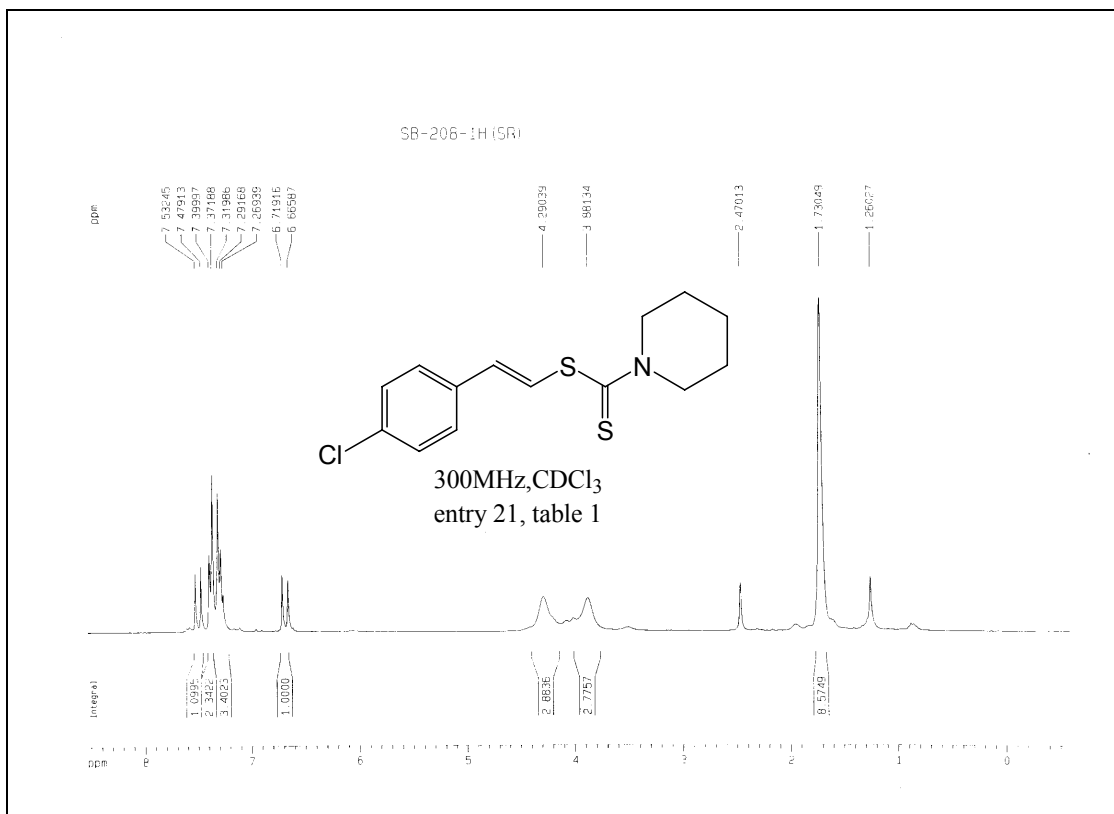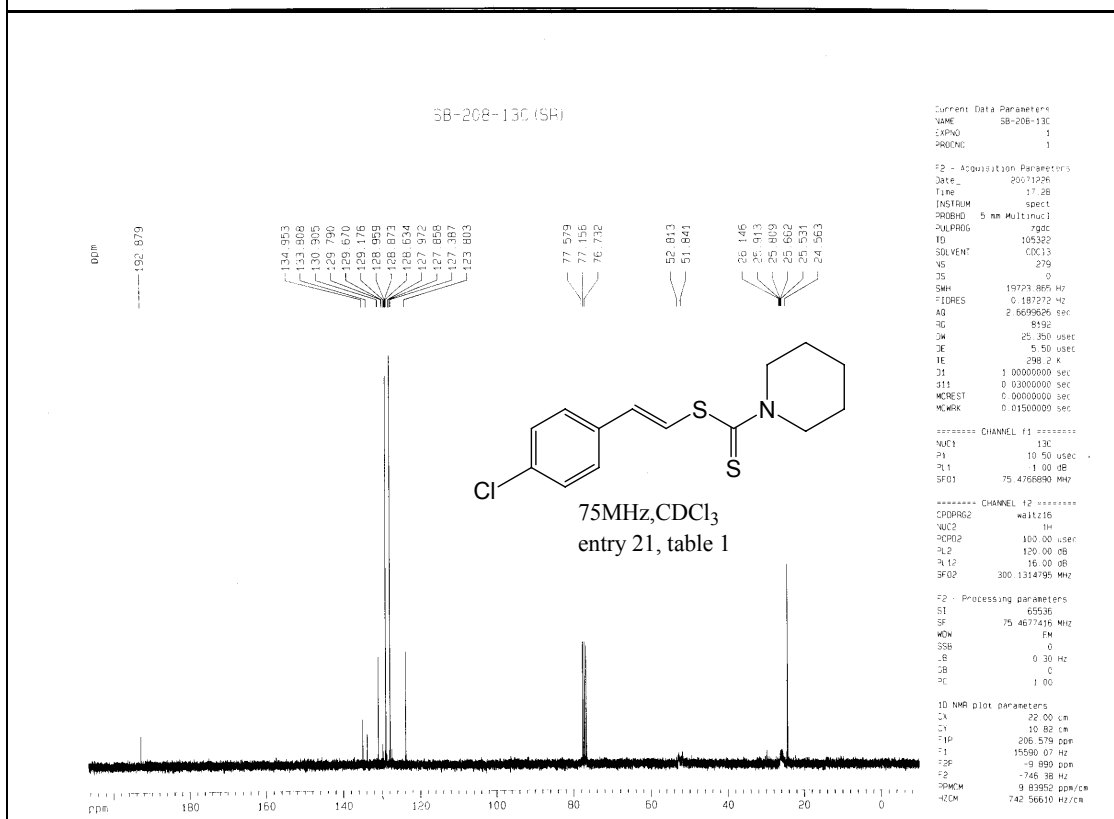

Supplement: b809200a.pdf [file b809200a.pdf]
